1 **TITLE PAGE**

2 **Title**

3 Complete genome assembly of clinical multidrug resistant *Bacteroides fragilis* isolates enables  
4 comprehensive identification of antimicrobial resistance genes and plasmids.

5 **Running title**

6 Genomes and plasmids of six clinical MDR *B. fragilis*

7 **Author names**

8 Thomas V. Sydenham<sup>1,2,3\*</sup>, Søren Overballe-Petersen<sup>4</sup>, Henrik Hasman<sup>4</sup>, Hannah Wexler<sup>5</sup>, Michael Kemp<sup>1,2</sup>,  
9 Ulrik S. Justesen<sup>1,2</sup>

10 **Affiliations**

11 <sup>1</sup>Research Unit of Clinical Microbiology, Department of Clinical Research, University of Southern Denmark,  
12 Odense, Denmark; <sup>2</sup>Department of Clinical Microbiology, Odense University Hospital, Odense, Denmark;  
13 <sup>3</sup>Department of Clinical Microbiology, Lillebaelt Hospital, Vejle, Denmark; <sup>4</sup>Bacteria, Parasites & Fungi,  
14 Statens Serum Institut, Copenhagen, Denmark; <sup>5</sup> GLAVA Health Care System and David Geffen School of  
15 Medicine at UCLA, Los Angeles, CA, United States.

16 **Corresponding author**

17 Thomas V. Sydenham, [Thomas.sydenham@rsyd.dk](mailto:Thomas.sydenham@rsyd.dk)

18 **ORCIDs**

19 Thomas V. Sydenham: 0000-0003-1058-2449

20 Henrik Hasman: 0000-0001-6314-2709

21 Michael Kemp: 0000-0001-5989-0421

22 Ulrik S. Justesen: 0000-0002-6130-1902

23 **KEYWORDS**

24 *Bacteroides fragilis*; antimicrobial resistance; genome sequencing; plasmid; oxford nanopore; hybrid  
25 assembly; insertion sequences

26 **REPOSITORIES**

27 Sequence files (MinION reads de-multiplexed with Deepbiner and basecalled with Albacore in fast5 format  
28 and Illumina MiSeq reads in fastq format) and final genome assemblies have been deposited to  
29 NCBI/ENA/DBJ under Bioproject accessions PRJNA525024, PRJNA244942, PRJNA244943, PRJNA244944,  
30 PRJNA253771, PRJNA254401, and PRJNA254455

31 **ABSTRACT**

32 *Bacteroides fragilis* constitutes a significant part of the normal human gut microbiota and can also act as an  
33 opportunistic pathogen. Antimicrobial resistance and the prevalence of antimicrobial resistance genes are  
34 increasing, and prediction of antimicrobial susceptibility based on sequence information could support  
35 targeted antimicrobial therapy in a clinical setting. Complete identification of insertion sequence (IS)  
36 elements carrying promoter sequences upstream of resistance genes is necessary for prediction of  
37 antimicrobial resistance. However, *de novo* assemblies from short reads alone are often fractured due to

38 repeat regions and the presence multiple copies of identical IS elements. Identification of plasmids in  
39 clinical isolates can aid in the surveillance of the dissemination of antimicrobial resistance and  
40 comprehensive sequence databases support microbiome and metagenomic studies. Here we test several  
41 short-read, hybrid and long-lead assembly pipelines by assembling the type strain *B. fragilis* CCUG4856T  
42 (=ATCC25285=NCTC9343) with Illumina short reads and long reads generated by Oxford Nanopore  
43 Technologies (ONT) MinION sequencing. Hybrid assembly with Unicycler, using quality filtered Illumina  
44 reads and Filtlong filtered and Canu corrected ONT reads produced the assembly of highest quality. This  
45 approach was then applied to six clinical multidrug resistant *B. fragilis* isolates and, with minimal manual  
46 finishing of chromosomal assemblies of three isolates, complete, circular assemblies of all isolates were  
47 produced. Eleven circular, putative plasmids were identified in the six assemblies of which only three  
48 corresponded to a known cultured *Bacteroides* plasmid. Complete IS elements could be identified upstream  
49 of antimicrobial resistance genes, however there was not complete correlation between the absence of IS  
50 elements and antimicrobial susceptibility. As our knowledge on factors that increase expression of  
51 resistance genes in the absence of IS elements is limited, further research is needed prior to implementing  
52 antimicrobial resistance prediction for *B. fragilis* from whole genome sequencing.

### 53 **IMPACT STATEMENT**

54 Bacterial whole genome sequencing is increasingly used in public health, clinical, and research laboratories  
55 for typing, identification of virulence factors, phylogenomics, outbreak investigation and identification of  
56 antimicrobial resistance genes. In some settings, diagnostic microbiome amplicon sequencing or  
57 metagenomic sequencing directly from clinical samples is already implemented and informs treatment  
58 decisions. The prospect of prediction of antimicrobial susceptibility based on resistome identification holds  
59 promises for shortening time from sample to report and informing treatment decisions. Databases with  
60 comprehensive reference sequences of high quality are a necessity for these purposes. *Bacteroides fragilis*  
61 is an important part of the human commensal gut microbiota and is also the most commonly isolated  
62 anaerobic bacterium from non-faecal clinical samples but few complete genome assemblies are available  
63 through public databases. The fragmented assemblies from short read de novo assembly often negate the  
64 identification of insertion sequences upstream of antimicrobial resistance genes, which is necessary for  
65 prediction of antimicrobial resistance from whole genome sequencing. Here we test multiple assembly  
66 pipelines with short read Illumina data and long read data from Oxford Nanopore Technologies MinION  
67 sequencing to select an optimal pipeline for complete genome assembly of *B. fragilis*. However, *B. fragilis* is  
68 a highly plastic genome with multiple inversive repeat regions, and complete genome assembly of six  
69 clinical multidrug resistant isolates still required minor manual finishing for half the isolates. Complete  
70 identification of known insertion sequences and resistance genes was possible from the complete genome.  
71 In addition, the current catalogue of *Bacteroides* plasmid sequences is augmented by eight new plasmid  
72 sequences that do not have corresponding, complete entries in the NCBI database. This work almost  
73 doubles the number of publicly available complete, finished chromosomal and plasmid *B. fragilis* sequences  
74 paving the way for further studies on antimicrobial resistance prediction and increased quality of  
75 microbiome and metagenomic studies.

### 76 **ABBREVIATIONS**

77 AMR, antimicrobial resistance; WGS, whole genome sequencing; IS, insertion sequence; ONT, Oxford  
78 Nanopore Technologies;

### 79 **DATA SUMMARY**

- 80 1. Sequence read files (Oxford Nanopore (ONT) fast5 files and Illumina fastq files) as well as the final  
81 genome assemblies have been deposited to NCBI/ENA/DBJ under Bioproject accessions

82 PRJNA525024, PRJNA244942, PRJNA244943, PRJNA244944, PRJNA253771, PRJNA254401, and  
83 PRJNA254455.

84 2. Fastq format of demultiplexed ONT reads trimmed of adapters and barcode sequences are available at  
85 [doi.org/10.5281/zenodo.2677927](https://doi.org/10.5281/zenodo.2677927)

86 3. Genome assemblies from the assembly pipeline validation are available at doi:  
87 [doi.org/10.5281/zenodo.2648546](https://doi.org/10.5281/zenodo.2648546).

88 4. Genome assemblies corresponding to each stage of the process of the assembly are available at  
89 [doi.org/10.5281/zenodo.2661704](https://doi.org/10.5281/zenodo.2661704).

90 5. Full commands and scripts used are available from GitHub: <https://github.com/thsyd/bfassembly>  
91 as well as a static version at [doi.org/10.5281/zenodo.2683511](https://doi.org/10.5281/zenodo.2683511)

## 92 INTRODUCTION

93 *Bacteroides fragilis* is a Gram-negative anaerobic bacterium that is commensal to the human gut but can  
94 act as an opportunistic pathogen; it is the most commonly isolated anaerobic bacteria from non-faecal  
95 clinical samples (1). Antimicrobial resistance rates are increasing for *B. fragilis*, especially for carbapenems  
96 and metronidazole, two widely used antimicrobials for treatment of severe infections and anaerobe  
97 bacteria (2,3). Antimicrobial susceptibility testing of anaerobes using agar dilution or gradient strip methods  
98 can be costly and labour intensive and despite efforts to validate disk diffusion as a less expensive option,  
99 turn-around time will still be least 18 hours and validation for individual species will be required (4).

100 Antimicrobial resistance prediction from bacterial whole genome sequences, from cultured isolates as well  
101 as metagenomes, could be implemented in clinical microbiology in the near future, with the potential for  
102 improved sample-to-report turnover time and possibly eliminating the need for phenotypical testing for  
103 individual species (5–8). For a few species, prediction of antimicrobial resistance from WGS has been  
104 validated, but for the majority of clinical relevant species challenges still remain (6,9,10).

105 Based on DNA-DNA hybridisation studies, *B. fragilis* can be divided into two DNA homology groups (division  
106 I and II), whose ribosomal contents are so different that the two divisions can be distinguished by mass  
107 spectrometry routinely used to identify isolates in clinical laboratories (11). *B. fragilis* division I carry the  
108 chromosomal cephalosporinase gene *cepA* whilst *B. fragilis* division II harbour the chromosomal metallo- $\beta$ -  
109 lactamase gene *cfiA* (also known as *ccrA*) (12,13). The *cfiA* gene can confer resistance to carbapenems, a  
110 class of antimicrobials usually reserved for patients with severe sepsis or infections with multidrug-resistant  
111 bacteria. But expression levels are partly controlled by insertion sequence (IS) elements carrying promotor  
112 sequences inserted upstream of the gene and only 30-50% of clinical isolates that harbour *cfiA* display  
113 phenotypically reduced susceptibility to carbapenems (3). The same pattern of expression control can be  
114 observed for genes associated with resistance to metronidazole (*nim* genes) and clindamycin (*erm* genes)  
115 (1).

116 In 2014 we observed that identification of IS elements upstream of known antimicrobial resistance genes in  
117 *B. fragilis* was hampered in short read *de novo* assemblies even though the genes could be identified (14).  
118 This occurred because contigs were often terminated close to the start of the resistance genes, presumably

119 due to the proliferation of multiple copies of the same IS elements throughout the *B. fragilis* genomes.  
120 Genome assemblies from short read sequencing technologies alone most often result in fragmented  
121 assemblies because of repetitive regions and genome elements with multiple occurrences in the  
122 chromosomes and plasmids (15,16). Therefore, we could not predict antimicrobial resistance (AMR)  
123 phenotypes in *B. fragilis* using only short reads for WGS since IS element identification is a prerequisite for  
124 correct genotype-phenotype associations. Long read sequencing technologies are increasingly being  
125 utilised to increase the contiguity of bacterial genome assemblies and often result in complete, closed  
126 chromosomes and plasmids (17–20). This provides possibilities for comprehensive identification of IS  
127 elements, insights into genome structures and characterisation of other mobilisable elements and  
128 associated genes. Complete identification and characterisation of plasmids in sequenced isolates would  
129 allow for improved analysis of the plasmid-mediated spread of antimicrobial resistance.

130 Bioinformatic analysis of WGS data depends heavily on high-quality reference databases. Anaerobes make  
131 up most of the bacterial human commensal microbiota but are most likely underrepresented in public  
132 databases of whole genomes from cultured isolates. The NCBI Genome database (accessed 31-03-2019)  
133 contains genome sequences of 191,411 bacteria of which 13,483 are marked as complete assemblies. Only  
134 seven of these are *Bacteroides fragilis* (21–27). In comparison there are 776 assemblies of *E. coli* marked as  
135 complete and 398 of *S. aureus*. Improving the representation of complete assemblies of *B. fragilis* in the  
136 public genome databases will support the development of antimicrobial resistance prediction from WGS as  
137 well as microbiome and metagenomic analysis projects.

138 The aims of this study were to select an optimal assembly software pipeline for complete, circular assembly  
139 of *Bacteroides fragilis* and demonstrate the utility of complete assembly for both plasmid identification and  
140 comprehensive detection of genes and IS elements associated with antimicrobial resistance. We assembled  
141 the *B. fragilis* CCUG4856T (= ATCC25285 = NCTC9343) reference strain utilising long reads generated with  
142 the MinION sequencer from Oxford Nanopore Technology (ONT) and high-quality Illumina short reads and  
143 selected the best assembly pipeline by comparing assemblies to the Sanger sequenced reference NCTC9343  
144 (RefSeq accession GCF\_000025985.1). The best assembly pipeline was then applied to six clinical multi-drug  
145 resistant *B. fragilis* isolates from our 2014 study (14).

## 146 **METHODS**

### 147 **Culture conditions and DNA extraction**

148 *Bacteroides fragilis* CCUG4856T and the six strains described in our previous study were included (14,21).  
149 Strains were stored at -80° in beef extract broth with 10% glycerol (SSI Diagnostica) and cultured on solid  
150 chocolate agar with added vitamin K and cysteine (SSI Diagnostica) for 48 hrs in an anaerobic atmosphere  
151 at 35 °C. Ten µl of culture was transferred to 14 ml saccharose serum broth (SSI Diagnostica) and incubated  
152 for 18 hrs under the same conditions. DNA was then extracted using the Genomic-Tip G/500 kit (Qiagen)  
153 following the manufacturers protocol for Gram negative bacteria and eluted into 5 mM Tris pH 7.5 0.5 mM  
154 EDTA buffer. Quality control was performed by measuring fragment length on a TapeStation 2500  
155 (Genomic DNA ScreenTape, Agilent), purity on the NanoDrop (ThermoFisher Scientific) and concentration  
156 on the Qubit (dsDNA BR kit; Invitrogen). The eluted DNA was then stored at -20 °C.

### 157 **Illumina library preparation, sequencing and quality control**

158 The strains had previously been sequenced and assembled using Illumina short reads for our previous study  
159 (14), but to minimise biological disparities we opted to re-sequence with Illumina using the same DNA  
160 extraction prepared for long read sequencing. Paired-end libraries were generated using the Nextera XT  
161 DNA sample preparation kit (Illumina) according to the manufacturer's protocol. DNA was sequenced on a  
162 MiSeq sequencer (Illumina) with 150 bp reads for a theoretical read depth of 100x. Read quality metrics  
163 were evaluated using FastQC (<https://www.bioinformatics.babraham.ac.uk/projects/fastqc/>) and fastp

164 v0.19.6 (28). Filterbytile from the BBmap package (<http://sourceforge.net/projects/bbmap/>) was used for  
165 removing low-quality reads based on positional information on the sequencing flowcell and TrimGalore  
166 ([http://www.bioinformatics.babraham.ac.uk/projects/trim\\_galore/](http://www.bioinformatics.babraham.ac.uk/projects/trim_galore/)), with settings --qual 20 and --length  
167 126, provided additional adapter and quality trimming. FastQ files were then randomly down-sampled to <  
168 100x crude read depth using an estimated genome size of 5.3 Mb, as higher read depths tend to reduce  
169 assembly quality (29).

## 170 Nanopore library preparation and MinION sequencing

171 Sequencing libraries were prepared using the Rapid Barcoding kit (SQK-RPB004; Oxford Nanopore  
172 Technologies) following the manufacturers protocol (version RPB\_9059\_v1\_revC\_08Mar2018) with SPRI  
173 bead clean up (AMPure XT beads; Beckman Coulter) as described. Sequencing was performed as multiplex  
174 runs on a MinION connected to a Windows PC with MinKnow v1.15.1 using FLO-MIN106 R9.4 flowcells.  
175 Raw fast5 files were transferred to the Computerome high performance cluster  
176 (<https://www.computerome.dk/>) for analysis. Four sequencing runs were performed, as the first two runs  
177 did not provide enough data for complete assembly of all isolates (see results section).

## 178 Fast5 demultiplexing, base-calling, quality control and filtering

179 The raw fast5 files were demultiplexed with Deepbinner v0.2.0 and base-called using Albacore v2.3.3,  
180 retaining only those barcodes Deepbinner and Albacore agreed upon for minimal barcode misclassification  
181 (30). Porechop v0.2.4 (<https://github.com/rrwick/Porechop>) with the --discard\_middle option was used for  
182 adapter and barcode trimming and read statistics were collected using NanoPlot (31). Filtlong v0.2.0  
183 (<https://github.com/rrwick/Filtlong>) was used to filter the long reads by either removing the worst 10% or  
184 by retaining 500Mbs in total, whichever option resulted in fewer reads.

## 185 Assembly validation

186 To select and validate the optimum assembly pipeline *Bacteroides fragilis* CCUG4856T was assembled using  
187 a variety of well-known assemblers and polishing tools (Table 1). Each assembler was run with the Filtlong  
188 filtered reads as input or the filtered reads corrected with Canu 1.8 (with standard settings,  
189 corMinCoverage=0, or coroutCoverage=999). Canu was also tested with the unfiltered reads as input.  
190 Hybrid assemblers used the filtered long reads and the filtered, trimmed and down-sampled Illumina reads.  
191 Unicycler includes polishing with Racon and Pilon. For assemblers other than Unicycler, Racon polishing  
192 with ONT reads was run for one or two rounds and Pilon was run until no changes were made or for a  
193 maximum of six rounds. Racon polishing with Illumina reads was run for one round.

194 The original Sanger sequenced *Bacteroides fragilis* NCTC9343 (=CCUG4856T) (21) downloaded from NCBI  
195 RefSeq (accession GCF\_000025985.1) was used as reference sequence for the assembly comparisons and  
196 Quast v5.0.2 was used for assembly summary statistics, indel count, and K-mer-based completion (32).  
197 BUSCO v3.0.2b with the bacteroidetes\_odb9 dataset, CheckM v1.0.12, and Prokka v1.13.3 were used to  
198 assess gene content (33–35). Average nucleotide identity was calculated using  
199 <https://github.com/chjp/ANI/blob/master/ANI.pl> and ALE v0.9, which uses a likelihood based approach to  
200 assess the quality of different assemblies, was also used to score the assemblies (36,37). Ranking of  
201 assemblies was based on number of contigs, number of circular contigs, closeness to total length compared  
202 to the reference genome, number of local misassemblies, number of mismatches per 100 kb, number of  
203 indels per 100kb, average nucleotide identity (ANI), CheckM and BUSCO scores, and the total ALE score (a  
204 higher score is better). Please see <https://github.com/thsvd/bfassembly> for full bioinformatics methods.

## 205 Genome assembly of MDR *B. fragilis* isolates

206 The assembly strategy deemed to produce the highest quality genome for CCUG4856T was chosen for  
207 initial assembly of the six MDR *B. fragilis* isolates. Manual finishing of incomplete assemblies was



208 performed using Bandage for visualisation of assembly graphs and BLASTn searches (38). Minimap2 and  
209 BWA MEM were used to map reads to the assemblies for coverage graphs (39,40). Long read assembly with  
210 Flye was compared to the Unicycler assembly and used to guide and validate the manual finishing results.  
211 Circlator's *fixstart* task was used to fix the start position of the manually finished genomes to be at the  
212 *dnaA* gene (41).

213 The assembled genomes were submitted to NCBI GenBank and annotated with PGAP (42). ABRicate v0.8.10  
214 (<https://github.com/tseemann/ABRicate>) (with options --minid 40 --mincov 25) was used to screen for  
215 antimicrobial resistance genes with the ResFinder (database date 19-08-2018), NCBI Bacterial Antimicrobial  
216 Resistance Reference Gene Database (database date 19-09-2018), and CARD (v2.0.3) databases,  
217 supplemented with nucleotide sequences for the multidrug efflux-pump genes *bexA* (GenBank:  
218 AB067769.1:3564..4895) and *bexB* (GenBank: AY375536.1:4599..5963) (43,44). IS elements were identified  
219 using ABRicate with data from the IS-finder database (<http://www-is.biotoul.fr/>, Update: 2018-07-25) (45).

## 220 Identification of plasmids and mobile genetic elements

221 The PLSDB web server (<https://ccb-microbe.cs.uni-saarland.de/plsdb/>) (data v. 2019\_03\_05) contains  
222 bacterial plasmid sequences retrieved from the NCBI and was used for screening and identifying putative  
223 plasmids sequences (46). Only hits to accessions from cultured organisms were included. Putative plasmids  
224 not identified using PLSDB, were evaluated by the read depth relative to the chromosome (higher relative  
225 read depth indicates plasmid sequence) and Pfam families covering known plasmid replication domains  
226 from Table 1 in reference (47) were downloaded from the Pfam database (Pfam 32.0,  
227 <https://pfam.xfam.org/>) and used for screening putative plasmids with ABRicate.

## 228 RESULTS

### 229 Sequencing data quality

230 For Illumina data, a median of 3,465,082 reads (interquartile range [IQR]: 3,177,493-5,001,077) were  
231 generated for each isolate (Supplementary Table S1)). After filtering, adapter-removal and down sampling a  
232 median of 449,022,741 bases (IQR: 433,517,549-530,257,210) were available per isolate with 87-96% Q30  
233 bases corresponding to calculated read depths of 75-103%. The %GC content of the reads for each isolate  
234 (median 42.9%, range: 42.6-43.3%) were very consistent and within the expected range for the *Bacteroides*  
235 genus (40-48%) (48) .

236 Isolates were sequenced in runs multiplexed with other isolates not included in this study. Based on initial  
237 test assemblies using Unicycler without filtering or Canu correction (not shown) it was concluded that data  
238 from the first ONT sequencing runs were to be supplemented by additional runs to increase the chance of  
239 complete assembly of all isolates. Concatenating reads from runs, a median of 75,598 reads [IQR: 50,210-  
240 112,065] with a median length of 2,938-4,393 bases were generated for each isolate (Supplementary Table  
241 S1). Filtering with Filtlong and correction with Canu resulted in a median of 8,515 reads (IQR: 6,226-10,370)  
242 with median lengths of 6,181-38,588 for each isolate as input for the assemblies.

### 243 Selecting the optimal assembly pipeline

244 141 assemblies of *B. fragilis* CCUG4856T were generated using the various assemblers and polishing steps  
245 (Supplementary Table S2). Compared to the reference genome, Unicycler assemblies were of the highest  
246 quality (Table 2 **Error! Reference source not found.**). Unicycler, with any of the read input options,  
247 produced two circular contigs of the expected lengths, and the differences between the various Unicycler  
248 assemblies were minimal (Table 3 **Error! Reference source not found.**). Assemblies with Canu corrected  
249 reads showed slightly higher genome fractions and average nucleotide identities to the reference and  
250 fewer mismatches and indels, when compared to Unicycler alone. Unicycler assemblies corrected with  
251 Racon using Illumina reads worsened slightly overall with 0.04-0.19 more indels and 0.14-0.25 more

252 mismatches per 100 kbp. Based on this initial evaluation, the assembly pipeline using Canu corrected reads  
253 with default options was chosen (Assembly “OF.CS” in Table 3). This would reduce the number of long  
254 reads, compared to Canu correction with corMinCoverage=0, or coroutCoverage=999, and thereby lead to  
255 a faster run-time for Unicycler.

256 The hybrid Unicycler assembly of CCUG4856T with standard Canu corrected ONT reads consists of two  
257 circular contigs of 5,205,133 and 36,560 bp in length. The plasmid is the same length as plasmid pBF9343  
258 from the reference assembly GCF\_000025985.1 and the chromosome is seven bases shorter. Alignments of  
259 the Sanger sequenced assembly GCF\_000025985.1 with the hybrid Unicycler assembly show an 88,045 bp  
260 inversion in the hybrid assembly compared to the Sanger assembly (Figure 1). This inversion is present in all  
261 the best assemblies, including assemblies derived from solely ONT sequences or Illumina sequences  
262 (Supplementary Figure S1) as well as two additional assemblies of NCTC9343/ATCC25285 from PacBio and  
263 Illumina sequences downloaded from NCBI RefSeq (Supplementary Figure S2).

#### 264 **Complete assembly of six multidrug resistant isolates**

265 Unicycler, using filtered and trimmed Illumina reads and the Filtlong filtered and Canu corrected ONT reads  
266 from the first sequencing runs, generated complete, continuous, circular assemblies for two of the six

267 isolates (BFO18 and BFO67) (

| Strain     | Best Spades graph | Hybrid assembly after first nanopore sequencing run. No Canu correction | Hybrid assembly after first nanopore sequencing run with Canu correction | Hybrid assembly with data from supplementary runs with Canu correction | After manual finishing | Final assemblies contig statistics |           |                     |
|------------|-------------------|-------------------------------------------------------------------------|--------------------------------------------------------------------------|------------------------------------------------------------------------|------------------------|------------------------------------|-----------|---------------------|
|            |                   |                                                                         |                                                                          |                                                                        |                        | No.                                | Length    | Relative read depth |
| CCUG 4856T |                   |                                                                         |                                                                          |                                                                        |                        | 1                                  | 5,205,133 | 1.00x               |
|            |                   |                                                                         |                                                                          |                                                                        |                        | 2                                  | 36,560    | 7.42x               |
| BFO17      |                   |                                                                         |                                                                          |                                                                        |                        | 1                                  | 5,474,541 | 1.00x               |
|            |                   |                                                                         |                                                                          |                                                                        |                        | 2                                  | 85,671    | 1.85x               |
|            |                   |                                                                         |                                                                          |                                                                        |                        | 3                                  | 5,594     | 23.03x              |
| BFO18      |                   |                                                                         |                                                                          |                                                                        |                        | 1                                  | 5,302,644 | 1.00x               |
|            |                   |                                                                         |                                                                          |                                                                        |                        | 2                                  | 7,221     | 25.98x              |
|            |                   |                                                                         |                                                                          |                                                                        |                        | 3                                  | 4,137     | 50.80x              |
|            |                   |                                                                         |                                                                          |                                                                        |                        | 4                                  | 2,782     | 59.91x              |
| S01        |                   |                                                                         |                                                                          |                                                                        |                        | 1                                  | 5,325,251 | 1.00x               |
|            |                   |                                                                         |                                                                          |                                                                        |                        | 2                                  | 78,085    | 2.29x               |
|            |                   |                                                                         |                                                                          |                                                                        |                        | 3                                  | 8,331     | 20.99x              |
|            |                   |                                                                         |                                                                          |                                                                        |                        | 4                                  | 5,595     | 22.67x              |
| BFO42      |                   |                                                                         |                                                                          |                                                                        |                        | 1                                  | 5,141,257 | 1.00x               |
|            |                   |                                                                         |                                                                          |                                                                        |                        | 2                                  | 8,306     | 40.06x              |
|            |                   |                                                                         |                                                                          |                                                                        |                        | 3                                  | 5,594     | 40.15x              |
| BFO67      |                   |                                                                         |                                                                          |                                                                        |                        | 1                                  | 5,478,614 | 1.00x               |
|            |                   |                                                                         |                                                                          |                                                                        |                        | 2                                  | 6,129     | 94.15x              |
| BFO85      |                   |                                                                         |                                                                          |                                                                        |                        | 1                                  | 5,504,076 | 1.00x               |

268

269 Figure 2). For the assemblies that were not complete with sequencing data from the first MinION runs,  
 270 increasing the amount of ONT data resulted in fewer contigs overall, except for BFO67, where the additional  
 271 data from the second sequencing run led to a fragmented assembly and manual finishing was necessary.  
 272 Performing assembly of isolate S01 without Canu correction of the ONT reads from the first sequencing  
 273 resulted in a closed chromosome and performing Canu correction of reads resulted in a fragmentation of  
 274 the chromosome. This was ameliorated by including more ONT data. By manual finishing using read  
 275 mapping and additional assembly with Flye, the remaining three assemblies were circularised.



276 Chromosomes varied in length from 5,141,257 – 5,504,076 bp. Alignment of ONT and Illumina reads to the  
277 chromosome assemblies showed even coverage for both sequencing technologies (Supplementary Figure  
278 S3). For BFO85 a >100% relative read depth increase was observed at approximately 25kb-38kb. This could  
279 represent a 12 kb repeat region that was not resolved in the assembly. Seven (47%) of the 15 PGAP  
280 annotated CDS' in the 13kb region were annotated as hypothetical proteins. None of the annotated CDS'  
281 represented mobilisable proteins.

## 282 **Eleven putative plasmid sequences were identified**

283 A total of 11 putative circular plasmids were identified in the six *B. fragilis* isolates (Table 4). Zero to three  
284 putative plasmids were identified per isolate with lengths varying from 2,782 to 85,671bp.

285 The PLSDB database contains NCBI RefSeq plasmid sequences marked as complete. Three of the 11  
286 putative plasmid sequences were found to match (ID > 98%) a sequence in PLSDB (Table 4). These three all  
287 matched the cryptic plasmid pBFP35 (49). The NCBI Nucleotide database was queried using BLASTn with  
288 the remaining unidentified putative plasmid sequences (50). BFO18 putative plasmid sequence pBFO18\_1  
289 (7,221 bp) resembles plasmid pIP421, a 7.2kb plasmid with metronidazole resistance gene *nimD* and  
290 *IS1169*. Partial sequences in NCBI GenBank spanning the *nimD* gene, IS element and *RepA* (GenBank  
291 Y10480.1 and X86702.1) showed 99 %ID to their alignment to pBFO18\_1 (not shown) (51,52). Strain S01  
292 putative plasmid sequence pBFS01\_2 (8,331 bp) showed 99.87 %ID to the 1486bp partial sequence of *B.*  
293 *fragilis* plasmid pBF388c (GenBank AM042593.1), a 8.3kb conjugative plasmid harbouring *nimE* and *ISBf6*  
294 (53).

295 None of the three putative plasmid sequences of strain BFO18 could be identified using the PLSDB but  
296 querying the NCBI nucleotide database using BLASTn revealed hits for all three. The hits corresponded to  
297 circularised sequences (%ID: 99.56-99.96, %COV: 100) assembled from mobilome metagenomic sequencing  
298 of the uncultured caecum content from a rat trapped at Bispebjerg Hospital in Copenhagen, Denmark (two  
299 hours' drive from Odense University Hospital where BFO18 was isolated from a patient's blood culture)  
300 (Supplementary Table S3) (47,54). BLASTn searches of the remaining unidentified putative plasmids from  
301 the other strains did not reveal complete hits.

302 Using ABRicate with the plasmid replication domains collected from the Pfam database, all putative  
303 plasmids, except pBF017\_1 and pBFS01\_1, were found to have recognised replicon domains (Table 4). DNA  
304 fragments of sizes matching pBF017\_1 and pBFS01\_1 were detected by PFGE of S1 endonuclease  
305 restriction enzyme treated plasmid DNA extracts (Supplementary Figure S4) and the circular structures of  
306 the two sequences lacking a predicted replication domain, were confirmed manually by visually inspecting  
307 BLASTn mapping of ONT sequences longer than 10 kbp to the assembled plasmid sequences with CLC  
308 Genomics Workbench 10 (Qiagen). Eleven and 22 ONT reads spanned the complete lengths of pBF017\_1  
309 and pBFS01\_1 respectively and contained no other elements. pBF017\_1 and pBFS01\_1 demonstrate a  
310 degree of similarity of close to 100%, except for an approximate total of 7,500 bp transposase and  
311 prophage sequences in pBF017\_1 (Figure 3). No alignment to chromosomal sequences of any of the  
312 included *B. fragilis* isolates was observed using progressiveMauve (not shown) (55).

313 The GC content of pBF017\_1 and pBFS01\_1 are 36.78% and 36.04% respectively. These lie within the range  
314 for the *Bacteroides* genus but differ from the expected value for *B. fragilis* (43%), which could indicate that  
315 the putative plasmids do not originate from *B. fragilis* (56). After supplementing the PGAP annotations with  
316 RAST annotation (57), 63% (pBF017\_1) and 59% (pBFS01\_1) of CDS' remained annotated as hypothetical  
317 or as domain of unknown function. Of the annotated CDS' the majority were associated with mobilisable  
318 features, plasmids and phages such as *parA* and *parB*, DNA partitioning proteins, conjugative transposon  
319 proteins, transposases, DNA binding motif domain containing proteins, and reverse transcriptase protein.  
320 The results above support the assembly data suggesting these two sequences are in fact plasmids.

## 321 **Detection of antimicrobial resistance genes and Insertion sequence elements**

322 We used ABRicate to screen assemblies for AMR genes (ResFinder, NCBI and CARD databases  
323 supplemented with sequences for *bexA* and *bexB*) and IS elements (IS-finder database); several AMR genes,  
324 possible homologs to known AMR genes and IS elements adjunct to the AMR genes were detected (Table  
325 5). Of note, isolate BFO17 contains two homologs of the metronidazole resistance gene *nimJ* (with a 100%  
326 consensus) and two isolates, S01 and BFO85, harbour two homologs of the tetracycline resistance gene  
327 *tetQ*. Homologs to *bexA* and *bexB* were identified with 73.53-99.12 %ID and were all confirmed with BLASTx  
328 searches against the NCBI nr database, as was done in our previous study (14). Partial hits for *ugd* was  
329 observed for several isolates, but with low %ID and %COV, and possible represent identification of  
330 conserved domains, but not *ugd* homologs. Increased expression of the *cfiA* metallo-beta-lactamase gene,  
331 *nim*-family 5-nitroimidazole genes and *erm* genes is partly regulated through IS elements containing  
332 promoter sequences. Full length IS elements could be identified upstream of 11 (79%) of 14 *cfiA*, *nim* and  
333 *erm* genes and upstream of two of three *CfxA4* genes and the *OXA-347* gene identified in BFO42. The  
334 described *Bacteroides fragilis* promoters TAnnTTTG (-7) and TG or TTG or TGTG (-33) (58) were searched for  
335 manually, but could not be identified upstream of the two *cfiA* genes in isolates BFO67 and BFO85 or the  
336 *ermB* gene in BFO85 for which no IS elements could be detected upstream (not shown).

## 337 **Correlation between identified genes and IS elements and phenotypical resistance**

338 As in our previous study, the *cfiA* gene was identified in the five meropenem resistant isolates (Table 5). All  
339 the *cfiA* genes were found on the chromosomal sequences. Complete IS elements were identified upstream  
340 of the *cfiA* genes in BFO17, BFO18 and S01, but not in BFO67 or BFO85. MICs for meropenem and  
341 imipenem were lower for these two isolates. *Nim* genes (-A, -D, -E and -J) could be found in the four  
342 metronidazole resistant isolates, all with complete IS elements upstream. Three of the *nim* genes were  
343 found on putative plasmids of the respective isolates. The four clindamycin-resistant isolates all carried  
344 *erm*-genes with upstream IS elements. A transposase was inserted in the *ermF*-gene in isolate BFO18,  
345 splitting it in two and the same isolate demonstrated a lower clindamycin MIC (6 mg/L) than the other  
346 three clindamycin resistant isolates.

## 347 **DISCUSSION**

### 348 **Hybrid genome assembly produces high quality *B. fragilis* genomes**

349 The primary aim of this study was to select and validate an assembly method to reliably complete  
350 chromosome and plasmid assembly of *B. fragilis* genomes. From 141 assembly variations, a hybrid  
351 approach using Filtlong filtered and Canu corrected ONT reads with quality filtered Illumina reads as input  
352 to Unicycler produced a complete, closed assembly of *B. fragilis* CCUG4856T with high similarity to the  
353 reference assembly of the original Sanger sequenced reference assembly. An 88kb inversion was observed  
354 when comparing the two assemblies. Cerdeño-Tárraga and colleagues observed difficulties in resolving  
355 certain regions of the Sanger sequenced assembly of NCTC9343 due to invertible regions with flanking  
356 inverted repeat sequences (21). The observed inversion in the hybrid Unicycler assembly, could be due to  
357 a) a superior assembly where the longer ONT reads have overcome the shortcomings of the shorter Sanger  
358 sequences, b) an incorrect assembly by Unicycler, c) a biological difference that has occurred over time  
359 between the strain stored at NCTC and CCUG, or d) a biological difference that occurred during the  
360 culturing of the strain, with dominance of a clone with the inversion, prior to DNA extraction as part of this  
361 study. The observations that the inversion is also present in all the best assemblies from this study and  
362 assemblies from two other research institutions support the conclusions that the current hybrid Unicycler  
363 assembly represents the true orientation of the 88kb sequence.

### 364 **Complete genome assembly of three of the six multidrug resistant isolates required manual finishing**

365 The assemblies of BFO18, S01, and BFO42 were completed by Unicycler without manual intervention, but  
366 the chromosomes of BFO17, BFO67, and BFO85 could only be closed by performing manual steps. The  
367 manual finishing steps are time consuming, difficult to replicate and are easily biased. In order to be  
368 implemented in routine clinical laboratories, large scale, automated, complete assembly of prokaryote  
369 genomes require robust methods with minimal human interaction. Genome assembly using another long-  
370 read assembler, Flye, supported the results of the manual finishing for two of three isolates. Flye is better  
371 at resolving repeats than miniasm, the long read assembler included in the Unicycler pipeline (59). One  
372 option could be to include the long-read assembly from Flye, in place of that of miniasm, to guide bridge  
373 building for the higher quality Illumina-only contigs produced in the first steps of Unicycler. To resolve  
374 repeats it is often necessary to have long reads that span the repeat. In prokaryotes repeats over 10kb are  
375 not unusual and they are often spanned by the ONT reads generated, even by novice researchers. But  
376 repeat regions of up to 120kb and duplications of 200kb have been described in some prokaryotes  
377 (17,18,60). ONT sequencing runs will routinely result in many reads that span the majority of repeats, but  
378 to obtain ONT reads that span specific 120-200kb repeats in a genome of interest still requires skill and a  
379 certain amount of luck. Protocols for ONT sequencing have been described that result in read lengths of  
380 over 2 Mb, but this requires skilled and experienced researchers and lab technicians and demands high  
381 amounts of very high quality input DNA and essentially sequencing of only one isolate per MinION flowcell  
382 (61).

383 ONT read depth did not serve as an indicator of whether the Unicycler assemblies would result in closed  
384 chromosomal contigs in this study. Final ONT read depth, prior to Filtlong filtering and Canu correction,  
385 ranged from 23-371x, but a high read depth alone, was not an indicator of closed contigs. The three  
386 assemblies BFO17, BFO67, and BFO85 required manual finishing to complete the assemblies and had ONT  
387 raw read depths of 99-137x. After Filtlong filtering and Canu correction the median read lengths were  
388 21,932-29,893b and read length N50 was 25,765-34,815b for the three isolates (Supplementary Table S1).  
389 Canu correction improved the Unicycler assembly of *B. fragilis* CCUG4856T by nearly all parameters. But  
390 whilst Canu correction of the data from the first sequencing run resulted in the complete assembly of  
391 BFO67, the assembly of S01 worsened slightly. Increasing the amount of ONT data for BFO67 fragmented  
392 the complete chromosome. However, increasing the ONT read depth did decrease the number of contigs  
393 per isolate in our study overall.

394 Defining an optimal approach for complete prokaryote genome assembly is a continuous process, as  
395 sequencing technologies and assembly software develop and mature. Ring and colleagues found that Canu  
396 correction prior to Unicycler hybrid assembly was superior to other hybrid assembly or long read assembly  
397 approaches for assembly of *Bordetella pertussis* genomes that contain long duplicated regions (18).  
398 Unicycler also performs well in other studies comparing assessing genome assemblers for bacterial genome  
399 and plasmid assembly (19). De Maio and colleagues recently published a preprint comparing hybrid  
400 assembly strategies for 20 *Enterobacteriaceae* isolates (20). In their dataset, simply randomly subsampling  
401 ONT reads to an approximate read depth of 100x was slightly superior to applying Canu correction or  
402 Filtlong filtering prior to Unicycler assembly. For 85% of isolates the expected number of circular contigs  
403 were all assembled. For only one additional isolate Canu correction or Filtlong filtering resulted in the  
404 assembly of the expected number of circular contigs. Manual steps, including down sampling ONT reads or  
405 removing the Canu correction are options to consider, if chromosomes are not complete and circularised  
406 after initial Unicycler assembly, providing ONT read depth of 100x is available.

407 We chose to benchmark a selection of widely used genome assemblers for short read, long-read and hybrid  
408 bacterial genome assembly as well as polishing tools for long read assemblies, but many other options have  
409 been published. Most assemblers and polishing tools were run using default parameters, and it is possible  
410 that further optimisation of settings for the individual software packages might have improved assemblies  
411 further than was demonstrated here. As sequencing technologies and assembly software continues to

412 improve, continued validation of pipelines is advisable. Software such as poreTally provides user friendly  
413 options for benchmarking genome assembly pipelines prior to implementation (62).

#### 414 ***Bacteroides* plasmids are not well represented in public databases**

415 A secondary aim of this study was to identify plasmids in the hybrid assemblies. Automated tools have been  
416 developed and validated for identification of plasmids from genome assemblies or read data, but they are  
417 dependant of collated databases of known plasmid sequences. As such, tools such as PlasmidFinder or  
418 mlplasmids can be applied for plasmid identification for *Enterobacteriaceae* or *Enterococcus faecium*, but *B.*  
419 *fragilis* is not supported at the time of writing (63,64). Therefore, we evaluated putative plasmid sequences  
420 by sequence identity and length comparison using the PLSDB webpage, identifying plasmid replication  
421 domains, and using circularisation and relative coverage as indicators that a sequence represents a plasmid  
422 in a given isolate.

423 Only four of the twelve plasmid sequences from the seven isolates could be identified using the PLSDB and  
424 three of these were the same plasmid, pBFP35. Two other putative plasmids, pBFO18\_1 and pBFS01\_2  
425 were likely plasmids pBF388c and pIP421 based on the partial sequences from these plasmids and plasmid  
426 length. This still leaves half of the circularised, putative plasmids unidentified. The two longer putative  
427 plasmids, pBFO17\_1 and pBFS01\_1, displayed a high degree of similarity, a GC% out of the normal range for  
428 *B. fragilis*, and a relative read depth of double the reads compared to the chromosome. Most annotated  
429 CDS' were associated with mobilisable elements, but no known plasmid replication domains could be  
430 identified. From the sequencing data alone, we cannot conclude that they represent true plasmids,  
431 however the findings above and manual inspection of long read mapping support that inference.

432 There are only 14 complete plasmid sequences from cultured *Bacteroides* isolates in the PLSDB  
433 v2019\_03\_05, which is based on the NCBI RefSeq database. Many other *Bacteroides* plasmids have been  
434 partially described, and some are represented by partial sequences or marked as contig level in the NCBI  
435 nucleotide database (65–68). Metagenomic sequencing and genome assembly projects are expanding the  
436 public sequence databases and screening the NCBI nucleotide database, sequences with a high degree of  
437 similarity to the putative plasmid sequences from one patient isolate (BFO18) could be found. These  
438 originated from a rat caecum metagenomic plasmid sequencing project from Copenhagen, a few hours'  
439 drive from Odense University Hospital. To understand and perform surveillance of the dissemination of  
440 plasmids there is a need for increased submissions of high quality, annotated and phenotypically validated  
441 sequences of bacterial isolates including plasmids. This study adds significantly to the number of complete  
442 plasmid sequences associated with *Bacteroides*.

#### 443 **Complete assembly allows comprehensive identification of resistance determinants in *B. fragilis***

444 We also intended to comprehensively identify resistance genes and IS elements in the hybrid genome  
445 assemblies. Using ABRicate with several resistance gene databases and IS-element nucleotide sequences,  
446 the findings of our previous study were confirmed and enhanced. Assemblies from Illumina sequencing  
447 alone would only allow partial IS element identification (14). Now, with the complete assemblies,  
448 comprehensive identification of known IS elements upstream of the relevant resistance genes could be  
449 completed. In our first study we used ResFinder with the available database at that time. Now, by including  
450 several databases, and lowering the %ID threshold, the number of genes identified increased. Additionally,  
451 for as a result of the complete genome assembly of BFO17, we could now identify two copies of *nimJ*, while  
452 only one copy was identified in the short read draft assembly of the same isolate in the previous study.  
453 Husain and colleagues identified the presence of three copies of *nimJ* in strain HMW615, when describing  
454 the *nimJ* gene (69). We confirmed this finding by running ABRicate on the HMW615 assembly as done with  
455 the isolates of this study (not shown). Interestingly, RAST annotates a third *nim* gene (nucleotide positions  
456 1,359,590..1,360,093) in the Unicycler hybrid assembly of BFO17, and the PGAP annotation includes an  
457 additional annotation of a pyridoxamine 5'-phosphate oxidase family gene (nucleotide positions

458 940,032..940,505), the family that includes the *nim*-genes. It is possible that one or more novel homologs  
459 of the *nim* are present in BFO17.

460 IS elements could be identified upstream of most relevant resistance genes. However, in three cases no IS  
461 element was present upstream of a resistance gene, even though the isolates displayed phenotypical  
462 resistance associated with increased expression of the specific gene. Known *B. fragilis* promoter sequences  
463 could not be identified upstream of the genes “missing” upstream IS elements, however *B. fragilis*  
464 promoters are still not completely described, so it is possible there are other unknown variants.

465 By selecting an optimal genome assembly strategy for *B. fragilis*, supplemented with minimal manual  
466 finishing efforts, and applying this to six multidrug resistant isolates, the number of complete *B. fragilis*  
467 genomes and plasmids in the public databases has now almost doubled. The future aim of performing  
468 antimicrobial resistance prediction based solely on WGS information for *B. fragilis* demands near-complete  
469 genomes for identification of IS elements upstream of resistance genes. However, we must caution that the  
470 absence of an IS element upstream of *cfiA* does not always correlate to susceptibility to carbapenems.  
471 Future studies are needed to address this, and utilising complete genome assembly for genome wide  
472 association studies is one approach that could be pursued. Technologies that provide a single solution for  
473 real-time, high-quality sequencing of long reads will be essential for implementing near real-time  
474 diagnostics of infectious diseases and characterisation of pathogens.

## 475 **AUTHOR STATEMENTS**

### 476 **Authors and contributors**

477 The study was conceptualised by T.V.S. and U.S.J. Funding was secured by T.V.S., M.K., H.H. and U.S.J. Data  
478 curation and investigation was performed by T.V.S.. Formal analysis was done by T.V.S. and S.O-P..  
479 Resources were provided by M.K., T.V.S., H.H. and U.S.J.. U.S.J, H.H. and M.K. supervised the work. T.V.S  
480 wrote the original draft and edited the manuscript. U.S.J., M.K., T.V.S., H.H., S.O-P. and H.M.W revised the  
481 manuscript.

### 482 **Conflicts of interest**

483 The authors declare that there are no conflicts of interest

### 484 **Funding information**

485 Funding supporting this work was provided from the Danish Medical Research Grant [case no. 2013-  
486 5480/912523-108] as well as internal funds from the Department of Clinical Microbiology, Odense  
487 University Hospital, Odense, Denmark. Thomas V. Sydenham’s salary as a PhD student was funded by the  
488 University of Southern Denmark and he received a travel grant from the Henrik & Emilie Ovesen  
489 Foundation.

### 490 **Ethical approval**

491 Isolates were obtained as part of routine clinical care, and details about the isolates have previously been  
492 published. No ethical approvals were required.

### 493 **Acknowledgements**

494 We are very grateful to Professor Henrik Westh, Department of Clinical Microbiology, Hvidovre Hospital,  
495 Denmark, for allowing use of their Computerome High Performance Computing cluster account for data  
496 analysis and to Mikala Wang, Dept. of Clinical Microbiology, Aarhus University hospital, for gifting us the  
497 MDR *B. fragilis* strain isolated at her department. We thank Valentina Galata, Saarland University,  
498 Saarbrücken, Germany (first author of the paper describing PLSDb) and Natalie Ring, University of Bath,  
499 Bath, United Kingdom (first author of reference (18)) for kind and helpful answers to questions via e-mail.



500 **References**

- 501 1. Wexler HM. Bacteroides: the good, the bad, and the nitty-gritty. *Clin Microbiol Rev.* 2007  
502 Oct;20(4):593–621. doi: 10.1128/CMR.00008-07
- 503 2. Nagy E, Urbán E, Nord CE. Antimicrobial susceptibility of *Bacteroides fragilis* group isolates in Europe:  
504 20 years of experience. *Clin Microbiol Infect Off Publ Eur Soc Clin Microbiol Infect Dis.* 2011  
505 Mar;17(3):371–9. doi: 10.1111/j.1469-0691.2010.03256.x
- 506 3. Ferløv-Schwensen SA, Sydenham TV, Hansen KC, Hoegh SV, Justesen US. Prevalences of antimicrobial  
507 resistance and the *cfiA* resistance gene in danish bacteroides fragilis group isolates since 1973. *Int J*  
508 *Antimicrob Agents.* 2017 Jun 27; doi: 10.1016/j.ijantimicag.2017.05.007
- 509 4. Nagy E, Justesen US, Eitel Z, Urbán E. Development of EUCAST disk diffusion method for susceptibility  
510 testing of the *Bacteroides fragilis* group isolates. *Anaerobe.* 2015 Feb;31:65–71. doi:  
511 10.1016/j.anaerobe.2014.10.008
- 512 5. Zankari E, Hasman H, Kaas RS, Seyfarth AM, Agersø Y, Lund O, et al. Genotyping using whole-genome  
513 sequencing is a realistic alternative to surveillance based on phenotypic antimicrobial susceptibility  
514 testing. *J Antimicrob Chemother.* 2013 Apr;68(4):771–7. doi: 10.1093/jac/dks496
- 515 6. Stoesser N, Batty EM, Eyre DW, Morgan M, Wyllie DH, Del Ojo Elias C, et al. Predicting antimicrobial  
516 susceptibilities for *Escherichia coli* and *Klebsiella pneumoniae* isolates using whole genomic sequence  
517 data. *J Antimicrob Chemother [Internet].* 2013 May 30 [cited 2013 Aug 19]; doi: 10.1093/jac/dkt180
- 518 7. Boolchandani M, D’Souza AW, Dantas G. Sequencing-based methods and resources to study  
519 antimicrobial resistance. *Nat Rev Genet.* 2019 Mar 18;1. doi: 10.1038/s41576-019-0108-4
- 520 8. Didelot X, Bowden R, Wilson DJ, Peto TEA, Crook DW. Transforming clinical microbiology with  
521 bacterial genome sequencing. *Nat Rev Genet.* 2012 Sep;13(9):601–12. doi: 10.1038/nrg3226
- 522 9. Davies TJ, Stoesser N, Sheppard AE, Abuoun M, Fowler PW, Swann J, et al. Reconciling the potentially  
523 irreconcilable? Genotypic and phenotypic amoxicillin-clavulanate resistance in *Escherichia coli*.  
524 bioRxiv. 2019 Jan 7;511402. doi: 10.1101/511402
- 525 10. Ellington MJ, Ekelund O, Aarestrup FM, Canton R, Doumith M, Giske C, et al. The role of whole  
526 genome sequencing in antimicrobial susceptibility testing of bacteria: report from the EUCAST  
527 Subcommittee. *Clin Microbiol Infect Off Publ Eur Soc Clin Microbiol Infect Dis.* 2017 Jan;23(1):2–22.  
528 doi: 10.1016/j.cmi.2016.11.012
- 529 11. Nagy E, Becker S, Sóki J, Urbán E, Kostrzewa M. Differentiation of division I (*cfiA*-negative) and division  
530 II (*cfiA*-positive) *Bacteroides fragilis* strains by matrix-assisted laser desorption/ionization time-of-  
531 flight mass spectrometry. *J Med Microbiol.* 2011 Nov;60(Pt 11):1584–90. doi: 10.1099/jmm.0.031336-  
532 0
- 533 12. Rogers MB, Parker AC, Smith CJ. Cloning and characterization of the endogenous cephalosporinase  
534 gene, *cepA*, from *Bacteroides fragilis* reveals a new subgroup of Ambler class A beta-lactamases.  
535 *Antimicrob Agents Chemother.* 1993 Nov;37(11):2391–400. doi: 10.1128/AAC.37.11.2391
- 536 13. Rasmussen BA, Gluzman Y, Tally FP. Cloning and sequencing of the class B beta-lactamase gene (*ccrA*)  
537 from *Bacteroides fragilis* TAL3636. *Antimicrob Agents Chemother.* 1990 Aug;34(8):1590–2.



- 538 14. Sydenham TV, Sóki J, Hasman H, Wang M, Justesen US, ESGAI (ESCMID Study Group on Anaerobic  
539 Infections). Identification of antimicrobial resistance genes in multidrug-resistant clinical *Bacteroides*  
540 *fragilis* isolates by whole genome shotgun sequencing. *Anaerobe*. 2015 Feb;31:59–64. doi:  
541 10.1016/j.anaerobe.2014.10.009
- 542 15. Ricker N, Qian H, Fulthorpe RR. The limitations of draft assemblies for understanding prokaryotic  
543 adaptation and evolution. *Genomics*. 2012 Sep;100(3):167–75. doi: 10.1016/j.ygeno.2012.06.009
- 544 16. Page AJ, De Silva N, Hunt M, Quail MA, Parkhill J, Harris SR, et al. Robust high-throughput prokaryote  
545 de novo assembly and improvement pipeline for Illumina data. *Microb Genomics* [Internet]. 2016 Aug  
546 25 [cited 2019 Apr 17];2(8). doi: 10.1099/mgen.0.000083
- 547 17. Schmid M, Frei D, Patrignani A, Schlapbach R, Frey JE, Remus-Emsermann MNP, et al. Pushing the  
548 limits of de novo genome assembly for complex prokaryotic genomes harboring very long, near  
549 identical repeats. *Nucleic Acids Res*. 2018 Sep 28;46(17):8953–65. doi: 10.1093/nar/gky726
- 550 18. Ring N, Abrahams JS, Jain M, Olsen H, Preston A, Bagby S. Resolving the complex *Bordetella pertussis*  
551 genome using barcoded nanopore sequencing. *Microb Genomics*. 2018 Nov 21; doi:  
552 10.1099/mgen.0.000234
- 553 19. Wick RR, Judd LM, Gorrie CL, Holt KE. Completing bacterial genome assemblies with multiplex MinION  
554 sequencing. *Microb Genomics* [Internet]. 2017 [cited 2018 Apr 3];3(10). doi: 10.1099/mgen.0.000132
- 555 20. Maio ND, Shaw LP, Hubbard A, George S, Sanderson N, Swann J, et al. Comparison of long-read  
556 sequencing technologies in the hybrid assembly of complex bacterial genomes. *bioRxiv*. 2019 Jan  
557 28;530824. doi: 10.1101/530824
- 558 21. Cerdeño-Tárraga AM, Patrick S, Crossman LC, Blakely G, Abratt V, Lennard N, et al. Extensive DNA  
559 inversions in the *B. fragilis* genome control variable gene expression. *Science*. 2005 Mar  
560 4;307(5714):1463–5. doi: 10.1126/science.1107008
- 561 22. Kuwahara T, Yamashita A, Hirakawa H, Nakayama H, Toh H, Okada N, et al. Genomic analysis of  
562 *Bacteroides fragilis* reveals extensive DNA inversions regulating cell surface adaptation. *Proc Natl*  
563 *Acad Sci U S A*. 2004 Oct 12;101(41):14919–24. doi: 10.1073/pnas.0404172101
- 564 23. Patrick S, Blakely GW, Houston S, Moore J, Abratt VR, Bertalan M, et al. Twenty-eight divergent  
565 polysaccharide loci specifying within- and amongst-strain capsule diversity in three strains of  
566 *Bacteroides fragilis*. *Microbiology*. 2010 Nov;156(Pt 11):3255–69. doi: 10.1099/mic.0.042978-0
- 567 24. Nikitina AS, Kharlampieva DD, Babenko VV, Shirokov DA, Vakhitova MT, Manolov AI, et al. Complete  
568 Genome Sequence of an Enterotoxigenic *Bacteroides fragilis* Clinical Isolate. *Genome Announc*  
569 [Internet]. 2015 May 7;3(3). doi: 10.1128/genomeA.00450-15
- 570 25. Risse J, Thomson M, Patrick S, Blakely G, Koutsovoulos G, Blaxter M, et al. A single chromosome  
571 assembly of *Bacteroides fragilis* strain BE1 from Illumina and MinION nanopore sequencing data.  
572 *GigaScience* [Internet]. 2015 Dec 4 [cited 2017 Jun 22];4. doi: 10.1186/s13742-015-0101-6
- 573 26. Soki, Jozsef. *Bacteroides fragilis* S14 genome sequencing and assembly (Data accessed on NCBI RefSeq  
574 database accession GCF\_001682215.1). 2015.

- 575 27. Ho P-L, Yau C-Y, Wang Y, Chow K-H. Determination of the mutant-prevention concentration of  
576 imipenem for the two imipenem-susceptible *Bacteroides fragilis* strains, Q1F2 (cfiA-positive) and  
577 ATCC 25282 (cfiA-negative). *Int J Antimicrob Agents*. 2018 Feb 1;51(2):270–1. doi:  
578 10.1016/j.ijantimicag.2017.08.004
- 579 28. Chen S, Zhou Y, Chen Y, Gu J. fastp: an ultra-fast all-in-one FASTQ preprocessor. *Bioinformatics*. 2018  
580 Sep 1;34(17):i884–90. doi: 10.1093/bioinformatics/bty560
- 581 29. Desai A, Marwah VS, Yadav A, Jha V, Dhaygude K, Bangar U, et al. Identification of Optimum  
582 Sequencing Depth Especially for De Novo Genome Assembly of Small Genomes Using Next Generation  
583 Sequencing Data. *PLoS ONE [Internet]*. 2013 Apr 12 [cited 2014 May 22];8(4). doi:  
584 10.1371/journal.pone.0060204
- 585 30. Wick RR, Judd LM, Holt KE. Deepbinner: Demultiplexing barcoded Oxford Nanopore reads with deep  
586 convolutional neural networks. *bioRxiv*. 2018 Sep 14;366526. doi: 10.1101/366526
- 587 31. De Coster W, D’Hert S, Schultz DT, Cruts M, Van Broeckhoven C. NanoPack: visualizing and processing  
588 long-read sequencing data. *Bioinformatics*. 2018 Aug 1;34(15):2666–9. doi:  
589 10.1093/bioinformatics/bty149
- 590 32. Gurevich A, Saveliev V, Vyahhi N, Tesler G. QUAST: quality assessment tool for genome assemblies.  
591 *Bioinformatics*. 2013 Apr 15;29(8):1072–5. doi: 10.1093/bioinformatics/btt086
- 592 33. Parks DH, Imelfort M, Skennerton CT, Hugenholtz P, Tyson GW. CheckM: assessing the quality of  
593 microbial genomes recovered from isolates, single cells, and metagenomes. *Genome Res*. 2015 Jul  
594 1;25(7):1043–55. doi: 10.1101/gr.186072.114
- 595 34. Waterhouse RM, Seppey M, Simão FA, Manni M, Ioannidis P, Klioutchnikov G, et al. BUSCO  
596 Applications from Quality Assessments to Gene Prediction and Phylogenomics. *Mol Biol Evol*. 2018  
597 Mar 1;35(3):543–8. doi: 10.1093/molbev/msx319
- 598 35. Seemann T. Prokka: rapid prokaryotic genome annotation. *Bioinformatics*. 2014 Jul 15;30(14):2068–9.  
599 doi: 10.1093/bioinformatics/btu153
- 600 36. Richter M, Rosselló-Móra R. Shifting the genomic gold standard for the prokaryotic species definition.  
601 *Proc Natl Acad Sci*. 2009 Oct 22;pnas.0906412106. doi: 10.1073/pnas.0906412106
- 602 37. Clark SC, Egan R, Frazier PI, Wang Z. ALE: a generic assembly likelihood evaluation framework for  
603 assessing the accuracy of genome and metagenome assemblies. *Bioinformatics*. 2013 Feb  
604 15;29(4):435–43. doi: 10.1093/bioinformatics/bts723
- 605 38. Wick RR, Schultz MB, Zobel J, Holt KE. Bandage: interactive visualization of de novo genome  
606 assemblies. *Bioinforma Oxf Engl*. 2015 Oct 15;31(20):3350–2. doi: 10.1093/bioinformatics/btv383
- 607 39. Li H. Minimap2: pairwise alignment for nucleotide sequences. *Bioinformatics*. 2018 Sep  
608 15;34(18):3094–100. doi: 10.1093/bioinformatics/bty191
- 609 40. Li H, Durbin R. Fast and accurate short read alignment with Burrows-Wheeler transform. *Bioinforma*  
610 *Oxf Engl*. 2009 Jul 15;25(14):1754–60. doi: 10.1093/bioinformatics/btp324

- 611 41. Hunt M, Silva ND, Otto TD, Parkhill J, Keane JA, Harris SR. Circlator: automated circularization of  
612 genome assemblies using long sequencing reads. *Genome Biol.* 2015 Dec 29;16:294. doi:  
613 10.1186/s13059-015-0849-0
- 614 42. Tatusova T, DiCuccio M, Badretdin A, Chetvernin V, Nawrocki EP, Zaslavsky L, et al. NCBI prokaryotic  
615 genome annotation pipeline. *Nucleic Acids Res.* 2016 19;44(14):6614–24. doi: 10.1093/nar/gkw569
- 616 43. Zankari E, Hasman H, Cosentino S, Vestergaard M, Rasmussen S, Lund O, et al. Identification of  
617 acquired antimicrobial resistance genes. *J Antimicrob Chemother.* 2012 Nov;67(11):2640–4. doi:  
618 10.1093/jac/dks261
- 619 44. Jia B, Raphenya AR, Alcock B, Waglechner N, Guo P, Tsang KK, et al. CARD 2017: expansion and model-  
620 centric curation of the comprehensive antibiotic resistance database. *Nucleic Acids Res.* 2017  
621 04;45(D1):D566–73. doi: 10.1093/nar/gkw1004
- 622 45. Siguier P, Perochon J, Lestrade L, Mahillon J, Chandler M. ISfinder: the reference centre for bacterial  
623 insertion sequences. *Nucleic Acids Res.* 2006 Jan 1;34(Database issue):D32–36. doi:  
624 10.1093/nar/gkj014
- 625 46. Galata V, Fehlmann T, Backes C, Keller A. PLSDB: a resource of complete bacterial plasmids. *Nucleic  
626 Acids Res.* 2019 Jan 8;47(D1):D195–202. doi: 10.1093/nar/gky1050
- 627 47. Jørgensen TS, Xu Z, Hansen MA, Sørensen SJ, Hansen LH. Hundreds of Circular Novel Plasmids and  
628 DNA Elements Identified in a Rat Cecum Metamobilome. *PLoS ONE [Internet].* 2014 Feb 4 [cited 2019  
629 Mar 12];9(2). doi: 10.1371/journal.pone.0087924
- 630 48. Shah HN. The Genus *Bacteroides* and Related Taxa. In: Balows A, Trüper HG, Dworkin M, Harder W,  
631 Schleifer K-H, editors. *The Prokaryotes: A Handbook on the Biology of Bacteria: Ecophysiology,  
632 Isolation, Identification, Applications [Internet].* New York, NY: Springer New York; 1992 [cited 2019  
633 Mar 21]. p. 3593–607. doi: 10.1007/978-1-4757-2191-1\_34
- 634 49. Sóki J, Wareham DW, Rátkai C, Aduse-Opoku J, Urbán E, Nagy E. Prevalence, nucleotide sequence and  
635 expression studies of two proteins of a 5.6kb, class III, *Bacteroides* plasmid frequently found in clinical  
636 isolates from European countries. *Plasmid.* 2010 Mar;63(2):86–97. doi:  
637 10.1016/j.plasmid.2009.12.002
- 638 50. Database resources of the National Center for Biotechnology Information. *Nucleic Acids Res.* 2016 Jan  
639 4;44(Database issue):D7–19. doi: 10.1093/nar/gkv1290
- 640 51. Trinh S, Haggoud A, Reysset G, Sebald M. Plasmids pIP419 and pIP421 from *Bacteroides*: 5-  
641 nitroimidazole resistance genes and their upstream insertion sequence elements. *Microbiol Read  
642 Engl.* 1995 Apr;141 ( Pt 4):927–35. doi: 10.1099/13500872-141-4-927
- 643 52. Haggoud A, Trinh S, Moumni M, Reysset G. Genetic analysis of the minimal replicon of plasmid pIP417  
644 and comparison with the other encoding 5-nitroimidazole resistance plasmids from *Bacteroides* spp.  
645 *Plasmid.* 1995 Sep;34(2):132–43. doi: 10.1006/plas.1995.9994
- 646 53. Sóki J, Gal M, Brazier JS, Rotimi VO, Urbán E, Nagy E, et al. Molecular investigation of genetic  
647 elements contributing to metronidazole resistance in *Bacteroides* strains. *J Antimicrob Chemother.*  
648 2006 Feb;57(2):212–20. doi: 10.1093/jac/dki443

- 649 54. Hartmeyer GN, Sóki J, Nagy E, Justesen US. Multidrug-resistant *Bacteroides fragilis* group on the rise  
650 in Europe? *J Med Microbiol*. 2012 Dec;61(Pt 12):1784–8. doi: 10.1099/jmm.0.049825-0
- 651 55. Darling AE, Mau B, Perna NT. progressiveMauve: Multiple Genome Alignment with Gene Gain, Loss  
652 and Rearrangement. *PLOS ONE*. 2010 Jun 25;5(6):e11147. doi: 10.1371/journal.pone.0011147
- 653 56. Nishida H. Comparative Analyses of Base Compositions, DNA Sizes, and Dinucleotide Frequency  
654 Profiles in Archaeal and Bacterial Chromosomes and Plasmids [Internet]. *International Journal of*  
655 *Evolutionary Biology*. 2012 [cited 2019 Apr 26]. doi: 10.1155/2012/342482
- 656 57. Brettin T, Davis JJ, Disz T, Edwards RA, Gerdes S, Olsen GJ, et al. RASTtk: a modular and extensible  
657 implementation of the RAST algorithm for building custom annotation pipelines and annotating  
658 batches of genomes. *Sci Rep*. 2015 Feb 10;5:8365. doi: 10.1038/srep08365
- 659 58. Bayley DP, Rocha ER, Smith CJ. Analysis of *cepA* and other *Bacteroides fragilis* genes reveals a unique  
660 promoter structure. *FEMS Microbiol Lett*. 2000 Dec 1;193(1):149–54. doi: 10.1111/j.1574-  
661 6968.2000.tb09417.x
- 662 59. Lin Y, Yuan J, Kolmogorov M, Shen MW, Chaisson M, Pevzner PA. Assembly of long error-prone reads  
663 using de Bruijn graphs. *Proc Natl Acad Sci*. 2016 Dec 27;113(52):E8396–405. doi:  
664 10.1073/pnas.1604560113
- 665 60. Kamath GM, Shomorony I, Xia F, Courtade TA, Tse DN. HINGE: long-read assembly achieves optimal  
666 repeat resolution. *Genome Res*. 2017;27(5):747–56. doi: 10.1101/gr.216465.116
- 667 61. Payne A, Holmes N, Rakyan V, Loose M. Whale watching with BulkVis: A graphical viewer for Oxford  
668 Nanopore bulk fast5 files. *bioRxiv*. 2018 May 3;312256. doi: 10.1101/312256
- 669 62. de Lannoy C, Risse J, de Ridder D. poreTally: run and publish de novo nanopore assembler  
670 benchmarks. *Bioinformatics* [Internet]. [cited 2019 Apr 26]; doi: 10.1093/bioinformatics/bty1045
- 671 63. Carattoli A, Zankari E, García-Fernández A, Larsen MV, Lund O, Villa L, et al. In Silico Detection and  
672 Typing of Plasmids using PlasmidFinder and Plasmid Multilocus Sequence Typing. *Antimicrob Agents*  
673 *Chemother*. 2014 Jul 1;58(7):3895–903. doi: 10.1128/AAC.02412-14
- 674 64. Arredondo-Alonso S, Rogers MRC, Braat JC, Verschuuren TD, Top J, Corander J, et al. mlplasmids: a  
675 user-friendly tool to predict plasmid- and chromosome-derived sequences for single species. *Microb*  
676 *Genomics* [Internet]. 2018 [cited 2019 May 9];4(11). doi: 10.1099/mgen.0.000224
- 677 65. Nguyen M, Vedantam G. Mobile genetic elements in the genus *Bacteroides*, and their mechanism(s)  
678 of dissemination. *Mob Genet Elem*. 2011;1(3):187–96. doi: 10.4161/mge.1.3.18448
- 679 66. Shkoporov AN, Khokhlova EV, Kulagina EV, Smeianov VV, Kuchmiy AA, Kafarskaya LI, et al. Analysis of  
680 a novel 8.9kb cryptic plasmid from *Bacteroides uniformis*, its long-term stability and spread within  
681 human microbiota. *Plasmid*. 2013 Mar 1;69(2):146–59. doi: 10.1016/j.plasmid.2012.11.002
- 682 67. McNulty NP, Wu M, Erickson AR, Pan C, Erickson BK, Martens EC, et al. Effects of diet on resource  
683 utilization by a model human gut microbiota containing *Bacteroides cellulosilyticus* WH2, a symbiont  
684 with an extensive glycobiome. *PLoS Biol*. 2013;11(8):e1001637. doi: 10.1371/journal.pbio.1001637

- 685 68. Pierce JV, Bernstein HD. Genomic Diversity of Enterotoxigenic Strains of *Bacteroides fragilis*. PLoS ONE  
686 [Internet]. 2016 Jun 27 [cited 2019 Mar 26];11(6). doi: 10.1371/journal.pone.0158171
- 687 69. Husain F, Veeranagouda Y, Hsi J, Meggersee R, Abratt V, Wexler HM. Two multidrug-resistant clinical  
688 isolates of *Bacteroides fragilis* carry a novel metronidazole resistance nimJ gene (nimJ). Antimicrob  
689 Agents Chemother. 2013 Aug;57(8):3767–74. doi: 10.1128/AAC.00386-13
- 690 70. Ruan J, Li H. Fast and accurate long-read assembly with wtdbg2. bioRxiv. 2019 Jan 26;530972. doi:  
691 10.1101/530972
- 692 71. Li H. Minimap and miniasm: fast mapping and de novo assembly for noisy long sequences.  
693 Bioinformatics. 2016 Jul 15;32(14):2103–10. doi: 10.1093/bioinformatics/btw152
- 694 72. Kolmogorov M, Yuan J, Lin Y, Pevzner PA. Assembly of long, error-prone reads using repeat graphs.  
695 Nat Biotechnol. 2019 Apr 1;1. doi: 10.1038/s41587-019-0072-8
- 696 73. Koren S, Walenz BP, Berlin K, Miller JR, Bergman NH, Phillippy AM. Canu: scalable and accurate long-  
697 read assembly via adaptive k-mer weighting and repeat separation. Genome Res. 2017 May  
698 1;27(5):722–36. doi: 10.1101/gr.215087.116
- 699 74. Bankevich A, Nurk S, Antipov D, Gurevich AA, Dvorkin M, Kulikov AS, et al. SPAdes: A New Genome  
700 Assembly Algorithm and Its Applications to Single-Cell Sequencing. J Comput Biol. 2012  
701 May;19(5):455–77. doi: 10.1089/cmb.2012.0021
- 702 75. Antipov D, Korobeynikov A, McLean JS, Pevzner PA. hybridSPAdes: an algorithm for hybrid assembly  
703 of short and long reads. Bioinformatics. 2016 Apr 1;32(7):1009–15. doi:  
704 10.1093/bioinformatics/btv688
- 705 76. Souvorov A, Agarwala R, Lipman DJ. SKESA: strategic k-mer extension for scrupulous assemblies.  
706 Genome Biol. 2018 Oct 4;19(1):153. doi: 10.1186/s13059-018-1540-z
- 707 77. Wick RR, Judd LM, Gorrie CL, Holt KE. Unicycler: Resolving bacterial genome assemblies from short  
708 and long sequencing reads. PLOS Comput Biol. 2017 Aug 6;13(6):e1005595. doi:  
709 10.1371/journal.pcbi.1005595
- 710 78. Loman NJ, Quick J, Simpson JT. A complete bacterial genome assembled *de novo* using only nanopore  
711 sequencing data. Nat Methods. 2015 Aug;12(8):733–5. doi: 10.1038/nmeth.3444
- 712 79. Vaser R, Sovic I, Nagarajan N, Sikic M. Fast and accurate de novo genome assembly from long  
713 uncorrected reads. Genome Res. 2017 Jan 18;gr.214270.116. doi: 10.1101/gr.214270.116
- 714 80. Walker BJ, Abeel T, Shea T, Priest M, Abouelliel A, Sakthikumar S, et al. Pilon: An Integrated Tool for  
715 Comprehensive Microbial Variant Detection and Genome Assembly Improvement. PLoS ONE. 2014  
716 Nov 19;9(11):e112963. doi: 10.1371/journal.pone.0112963
- 717 81. Krumsiek J, Arnold R, Rattei T. Gepard: a rapid and sensitive tool for creating dotplots on genome  
718 scale. Bioinforma Oxf Engl. 2007 Apr 15;23(8):1026–8. doi: 10.1093/bioinformatics/btm039
- 719 82. Sullivan MJ, Petty NK, Beatson SA. Easyfig: a genome comparison visualizer. Bioinformatics. 2011 Apr  
720 1;27(7):1009–10. doi: 10.1093/bioinformatics/btr039

721 83. Arndt D, Grant JR, Marcu A, Sajed T, Pon A, Liang Y, et al. PHASTER: a better, faster version of the  
722 PHAST phage search tool. *Nucleic Acids Res.* 2016 08;44(W1):W16-21. doi: 10.1093/nar/gkw387

723



724 **TABLES AND FIGURES**

725

| <b>Genome assembler and version</b>     | <b>Link</b>                                                                                   | <b>Reference</b> |
|-----------------------------------------|-----------------------------------------------------------------------------------------------|------------------|
| Wtdbg2 v2.3                             | <a href="https://github.com/ruanjue/wtdbg2">https://github.com/ruanjue/wtdbg2</a>             | (70)             |
| Miniasm v0.3r179                        | <a href="https://github.com/lh3/miniasm">https://github.com/lh3/miniasm</a>                   | (39,71)          |
| Flye v2.3.7                             | <a href="https://github.com/fenderglass/Flye">https://github.com/fenderglass/Flye</a>         | (59,72)          |
| Canu v1.8                               | <a href="https://github.com/marbl/canu">https://github.com/marbl/canu</a>                     | (73)             |
| Spades (including Hybridspades) v3.13.0 | <a href="https://github.com/ablab/spades">https://github.com/ablab/spades</a>                 | (74,75)          |
| Skesa v2.3.0                            | <a href="https://github.com/ncbi/SKESA">https://github.com/ncbi/SKESA</a>                     | (76)             |
| Unicycler v0.4.7                        | <a href="https://github.com/rrwick/Unicycler">https://github.com/rrwick/Unicycler</a>         | (77)             |
| <b>Assembly polishing tools</b>         |                                                                                               |                  |
| Nanopolish v0.10.2                      | <a href="https://github.com/jts/nanopolish">https://github.com/jts/nanopolish</a>             | (78)             |
| Racon v1.3.1                            | <a href="https://github.com/isovic/racon">https://github.com/isovic/racon</a>                 | (79)             |
| Pilon v1.22                             | <a href="https://github.com/broadinstitute/pilon">https://github.com/broadinstitute/pilon</a> | (80)             |

726 Table 1 - Genome assemblers and polishing tools tested

| Assembly                    | Contigs | Largest contig | Total length | Mis-assemblies | Genome fraction (%) | Mismatches per 100 kbp | Indels per 100 kbp | Average nucleotide identity | CheckM Completeness | BUSCOs: complete and single-copy/complete and duplicate/fragment (of 443) | Prokka genes | Prokka rRNA | Prokka tRNA | Total ALE score |
|-----------------------------|---------|----------------|--------------|----------------|---------------------|------------------------|--------------------|-----------------------------|---------------------|---------------------------------------------------------------------------|--------------|-------------|-------------|-----------------|
| GCF_000025985.1             | 2       | 5,205,140      | 5,241,700    | 0              | 100.000             | 0                      | 0                  | 100.0000                    | 99.26               | 442/0/1                                                                   | 4439         | 19          | 73          | -17071758.95    |
| Skesa                       | 46      | 553,341        | 5,201,945    | 3              | 99.237              | 0.23                   | 0.15               | 99.9980                     | 99.26               | 440/2/1                                                                   | 4391         | 2           | 62          | -20926329.69    |
| Spades                      | 23      | 1,779,941      | 5,212,217    | 4              | 99.396              | 0.44                   | 0.17               | 99.9866                     | 99.26               | 440/2/1                                                                   | 4407         | 3           | 56          | -19676529.39    |
| Canu.OF.CO.R<br>O2.RI.PI3   | 2       | 5,247,938      | 5,350,432    | 8              | 99.972              | 4.94                   | 15.9               | 99.9752                     | 99.26               | 442/0/1                                                                   | 4634         | 19          | 73          | -19283611.73    |
| Flye.OF.CS.PI5.<br>RI       | 5       | 2,282,650      | 5,269,269    | 4              | 99.917              | 1.07                   | 6.24               | 99.9781                     | 99.26               | 441/1/1                                                                   | 4476         | 19          | 73          | -18222322.23    |
| Miniasm.OF.C<br>M.RO2.PI5   | 3       | 5,204,445      | 5,277,434    | 2              | 99.972              | 5.21                   | 17.75              | 99.9691                     | 98.88               | 442/0/1                                                                   | 4607         | 19          | 73          | -17789234.97    |
| Wtdbg2.OF.CO<br>.RO2.PI6.RI | 3       | 5,192,352      | 5,234,448    | 7              | 99.723              | 3.23                   | 3.04               | 99.9807                     | 99.26               | 442/0/1                                                                   | 4437         | 19          | 73          | -18750266.21    |
| SpadesHybrid.<br>CS         | 5       | 3,093,122      | 5,242,724    | 7              | 99.987              | 1.89                   | 0.53               | 99.9856                     | 99.26               | 440/2/1                                                                   | 4441         | 19          | 73          | -18535980.68    |
| Unicycler.OF.C<br>S         | 2       | 5,205,133      | 5,241,693    | 2              | 99.972              | 0.84                   | 0.48               | 99.9997                     | 99.26               | 442/0/1                                                                   | 4435         | 19          | 73          | -17200232.52    |

728 Table 2. Selected quality indicators for the best genome assembly of *B. fragilis* CCUG4856T per assembly pipeline. RefSeq accession GCF\_000025985.1  
729 was used as reference. OF: ONT reads filtered with Filtlong, CS: Canu corrected standard settings, CM: Canu corrected with option corMinCoverage=0,  
730 CO: Canu corrected with option coroutCoverage=999, RO2: Two rounds of Racon polishing with ONT reads, RI: Racon polishing with Illumina reads,  
731 PI[n]: Pilon polishing with Illumina reads, [n] rounds. Full results are available in Supplementary Table S2.

733

| Assembly        | Total length (bp) | Largest contig (bp) | Local mis-assemblies | Genome fraction (%) | Mismatches per 100 kbp | Indels per 100 kbp | K-mer-based compl. (%) | K-mer-based misjoins | Average nucleotide identity | Prokka CDS | Prokka genes | Total ALE score |
|-----------------|-------------------|---------------------|----------------------|---------------------|------------------------|--------------------|------------------------|----------------------|-----------------------------|------------|--------------|-----------------|
| GCF_000025985.1 | 5,241,700         | 5,205,140           | 0                    | 100.000             | 0                      | 0                  | 100.00                 | 0                    | 100.00000                   | 4346       | 4439         | -17071758.95    |
| OF              | 5,241,602         | 5,205,042           | 3                    | 99.970              | 1.11                   | 0.65               | 99.96                  | 0                    | 99.99896                    | 4343       | 4436         | -17245134.52    |
| OF.RI           | 5,241,606         | 5,205,046           | 3                    | 99.970              | 1.09                   | 0.67               | 99.96                  | 3                    | 99.99887                    | 4345       | 4438         | -17247815.86    |
| OF.CS           | 5,241,693         | 5,205,133           | 2                    | 99.972              | 0.84                   | 0.48               | 99.97                  | 1                    | 99.99974                    | 4342       | 4435         | -17200232.52    |
| OF.CS.RI        | 5,241,698         | 5,205,138           | 2                    | 99.972              | 0.88                   | 0.52               | 99.96                  | 1                    | 99.99968                    | 4346       | 4439         | -17206271.66    |
| OF.CM           | 5,241,691         | 5,205,131           | 2                    | 99.972              | 0.88                   | 0.5                | 99.96                  | 1                    | 99.99966                    | 4343       | 4436         | -17201292.44    |
| OF.CM.RI        | 5,241,696         | 5,205,136           | 2                    | 99.972              | 0.95                   | 0.55               | 99.97                  | 1                    | 99.99975                    | 4343       | 4436         | -17193184.79    |
| OF.CO           | 5,241,693         | 5,205,133           | 2                    | 99.972              | 0.84                   | 0.48               | 99.97                  | 1                    | 99.99974                    | 4342       | 4435         | -17200232.52    |
| OF.CO.RI        | 5,241,698         | 5,205,138           | 2                    | 99.972              | 0.88                   | 0.52               | 99.96                  | 1                    | 99.99968                    | 4346       | 4439         | -17206271.66    |

734 Table 3. Hybrid Unicycler assemblies of *B. fragilis* CCUG4856T. RefSeq accession GCF\_000025985.1 was used as reference. OF: ONT reads filtered with  
735 Filtlong; CS: Canu corrected standard settings; CM: Canu corrected with option corMinCoverage=0; CO: Canu corrected with option  
736 coroutCoverage=999; RI: Racon polishing with Illumina reads. Unicycler performs assembly polishing with Racon (ONT reads) and Pilon. Full results are  
737 available in Supplementary Table S2.

738

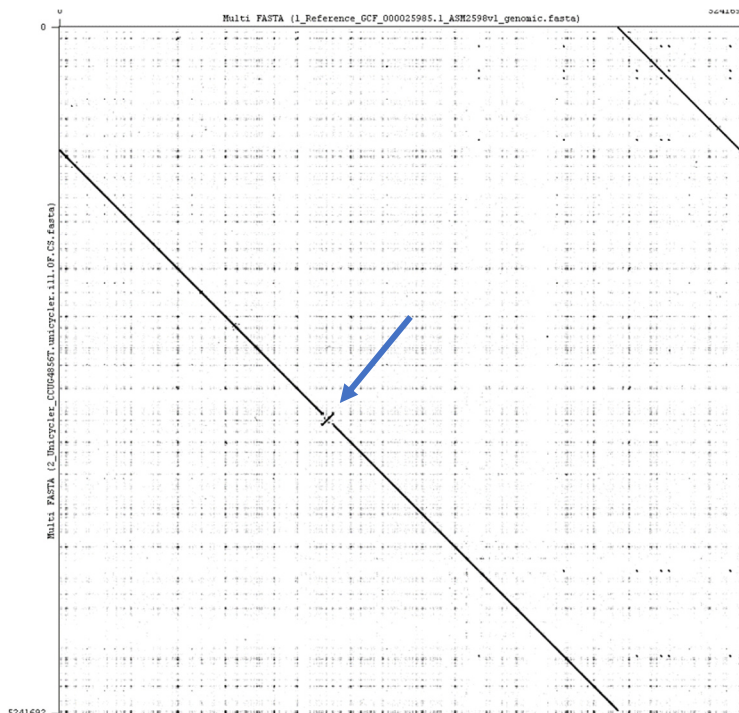

739

740 Figure 1. Dot plot matrix of the alignment of the reference assembly and the hybrid Unicycler assembly  
741 using Gepard v1.40 (81). The *B. fragilis* NCTC9343 (RefSeq GCF\_000025985.1) reference assembly derived  
742 from Sanger sequencing is on the x-axis and the hybrid Unicycler assembly on the y-axis. On this otherwise  
743 near perfect alignment with high similarity, an 88,045 bp inversion with 100% ID is observed at nucleotide  
744 positions 2,941,962..3,030,006 on the Unicycler assembly (2,005,742..2,093,786 on the reference  
745 sequence) (indicated by the blue arrow).

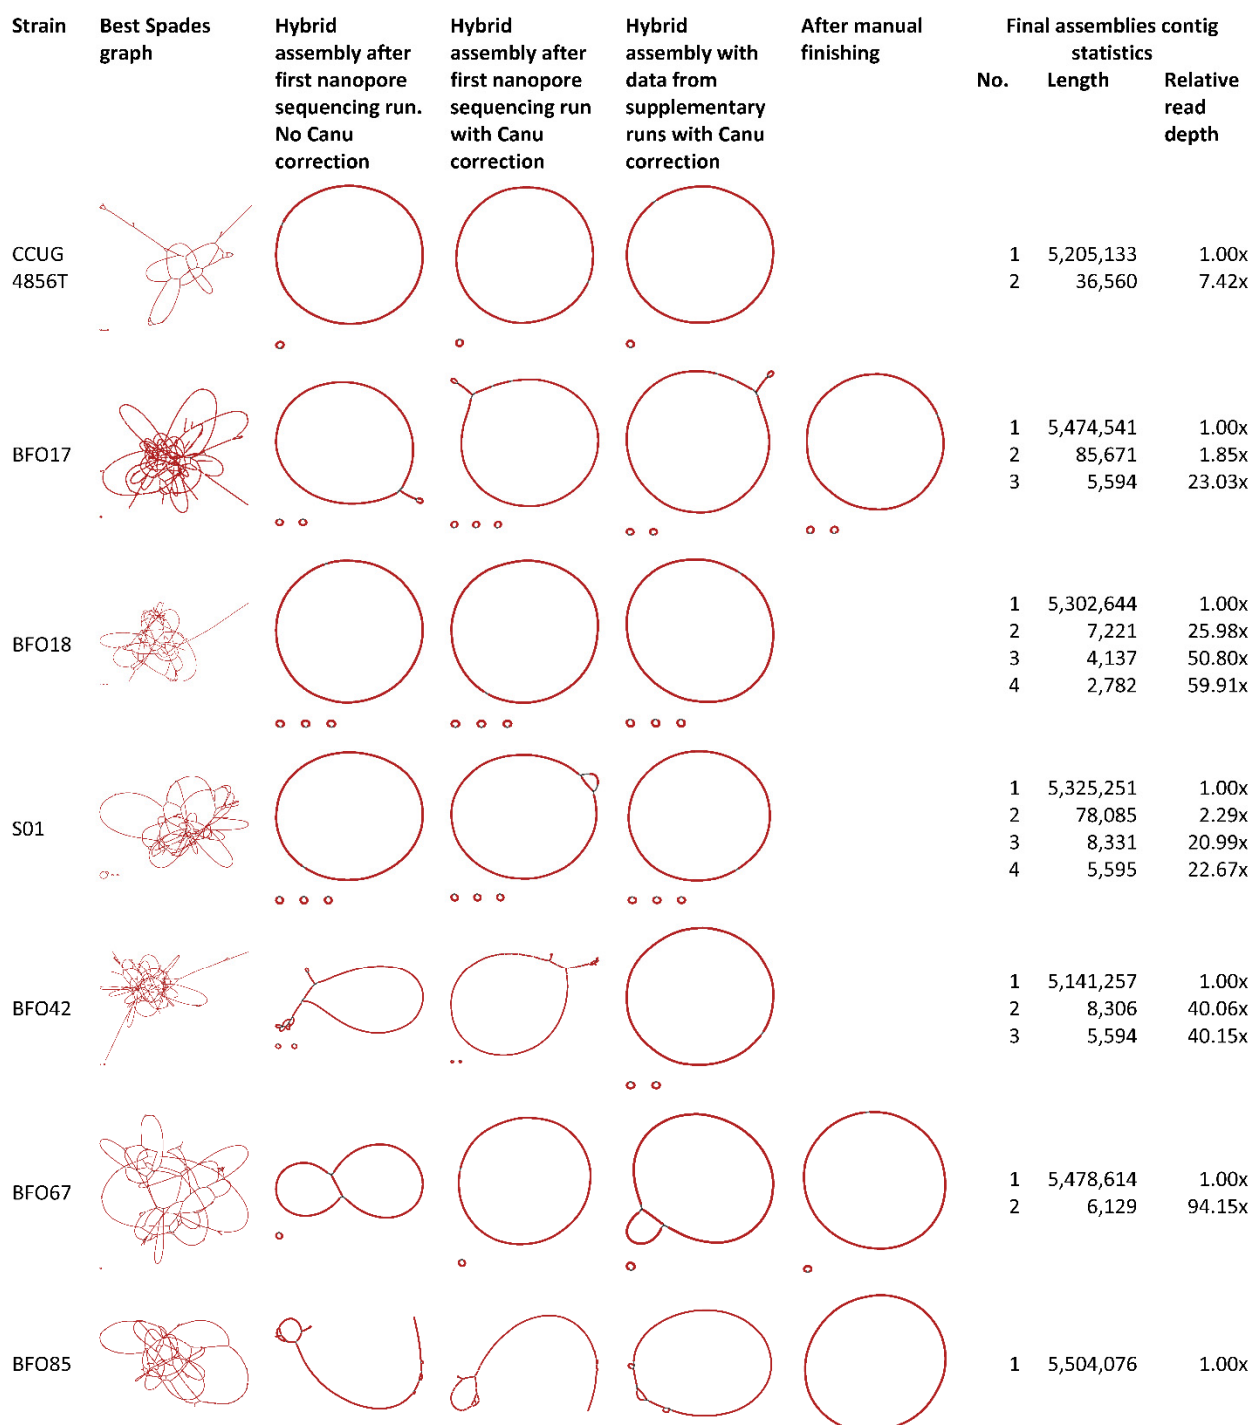

746

747 Figure 2. Evolution of genome assemblies with added data and manual finishing. The best SPAdes assembly  
748 graphs by Unicycler with short reads only are shown on the far left. Supplying ONT reads improved the  
749 assemblies overall, but only three were circularised with singular chromosome contigs with data from the  
750 initial MinION sequencing runs. Adding additional ONT data and correcting reads with Canu did not  
751 improve assemblies for all isolates. Manual finishing was necessary to finish assemblies for three isolates.  
752 Assembly graph images generated with Bandage. Read information can be found in Supplementary Table  
753 S1.

| Strain    | Sequence | Length (bp) | Relative read depth |       | GC%         | PLSDB results          |                  |        | Plasmid replicon family (%COV, %ID) |
|-----------|----------|-------------|---------------------|-------|-------------|------------------------|------------------|--------|-------------------------------------|
|           |          |             |                     |       |             | Best hit accession no. | Plasmid hit name | %ID    |                                     |
| CCUG4856T | Chr.     | 5,205,133   | 1.00x               | 43.19 | -           | -                      | -                | -      | -                                   |
|           | pBF9343  | 36,560      | 7.42x               | 32.19 | NC_006873.1 | pBF9343                | 100              | 36,560 | Rep_3 (100/100)                     |
| BFO17     | Chr.     | 5,474,541   | 1.00x               | 43.51 | -           | -                      | -                | -      | -                                   |
|           | pBFO17_1 | 85,671      | 1.85x               | 36.78 | NC_006873.1 | pBF9343                | 80.7             | 36,560 | none                                |
|           | pBFO17_2 | 5,594       | 23.03x              | 39.65 | NC_011073.1 | pBFP35                 | 99.9             | 5,594  | Rep_1 (100/100)                     |
| BFO18     | Chr.     | 5,302,644   | 1.00x               | 43.34 | -           | -                      | -                | -      | -                                   |
|           | pBFO18_1 | 7,221       | 25.98x              | 42.32 | NC_015168.1 | pBACSA02               | 85.6             | 19,280 | Rep_3 (99.69/99.69)                 |
|           | pBFO18_2 | 4,137       | 50.80x              | 45.40 | NC_019534.1 | pBFUK1                 | 92.2             | 12,817 | Rep_3 (100.00/98.24)                |
|           | pBFO18_3 | 2,782       | 59.91x              | 41.45 | NC_005026.1 | pBI143                 | 94.6             | 2,747  | RepL (89.66/49.22) <sup>a</sup>     |
| S01       | Chr.     | 5,325,251   | 1.00x               | 43.57 | -           | -                      | -                | -      | -                                   |
|           | pBFS01_1 | 78,085      | 2.29x               | 36.04 | NC_006873.1 | pBF9343                | 80.7             | 36,560 | none                                |
|           | pBFS01_2 | 8,331       | 20.99x              | 41.17 | NC_015166.1 | pBACSA03               | 95.6             | 6,277  | Rep_3 (100.00/97.85)                |
|           | pBFS01_3 | 5,595       | 22.67x              | 39.62 | NC_011073.1 | pBFP35                 | 99.9             | 5,594  | Rep_1 (100.00/99.48)                |
| BFO42     | Chr.     | 5,141,257   | 1.00x               | 43.35 | -           | -                      | -                | -      | -                                   |
|           |          |             |                     |       |             |                        |                  |        | RHH_1 (92.94/64.63)                 |
|           | pBFO32_1 | 8,306       | 40.06x              | 43.34 | KJ830768.1  | pBF69566b              | 96.0             | 11,019 | Rep_3 (93.64/68.31)                 |
|           | pBFO32_2 | 5,594       | 40.15x              | 39.63 | NC_011073.1 | pBFP35                 | 99.9             | 5,594  | Rep_1 (100.00/99.48)                |
| BFO67     | Chr.     | 5,478,614   | 1.00x               | 43.85 | -           | -                      | -                | -      | -                                   |
|           | pBFO67_1 | 6,129       | 94.15x              | 41.67 | NC_011073.1 | pBFP35                 | 76.9             | 5,594  | Rep_3 (100.00/99.69)                |
| BFO85     | Chr.     | 5,504,076   | 1.00x               | 43.60 | -           | -                      | -                | -      | -                                   |

754 Table 4. Putative plasmid sequences of the complete *B. fragilis* assemblies. Putative plasmid sequences from the hybrid assemblies of *B. fragilis*  
 755 CCUG4856T and the six MDR *B. fragilis* isolates were screened using the PLSDB. The best hit to plasmids from cultured isolates is shown. Only three  
 756 putative plasmids from the MDR *B. fragilis* isolate assemblies could be identified with confident %ID. For most sequences, plasmid replication family  
 757 proteins were identified in the putative plasmids using ABRicate with a database of sequences downloaded from the Pfam database, strengthening



758 the interpretation that the circularised putative plasmid sequences do in fact represent plasmids harboured by the isolates. Notes: <sup>a</sup>Annotated as  
759 RepA protein in the PGAP annotation. Abbreviations: %ID, %COV, no.; number, Chr.; chromosome.

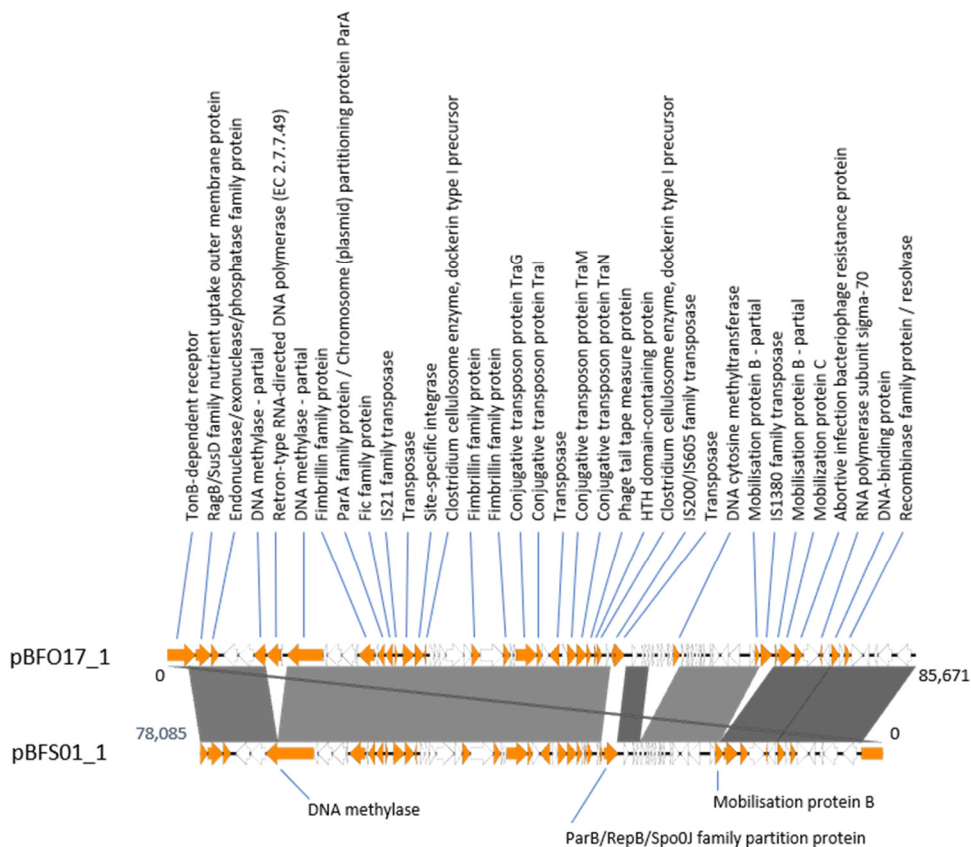

760

761 Figure 3. Linear representation of an alignment of putative circular plasmid sequences pBFO17\_1  
 762 pBFS01\_1. Comparison of the putative circular plasmids pBFO17\_1 and pBFS01\_1 (reverse complement for  
 763 better visualisation) using EasyFig (82). EasyFig uses BLAST to identify sequences of similarity. Sequence  
 764 similarities of >98% is indicated by full colouring, a darker colour indicates a higher %ID. Products of  
 765 annotated CDS' are shown. CDS' annotated as hypothetical or Domain of Unknown Function are coloured  
 766 white. The two sequences show a very high degree of similarity. pBFO17\_1 is 7,586 bp longer than  
 767 pBFS01\_1. This is mainly due to the insertion of a reverse transcriptase (pBFO17\_1, 11367..13034)  
 768 (disrupting a DNA methylase), the insertion of prophage from position 56125 to 61162) (identified as an  
 769 incomplete prophage using PHASTER (83)) and an IS1380 family-like transposase (67933..69237). The  
 770 regions pBFO17\_1 50711..52501 and pBFS01\_1 32248..30304 are not similar. Possibly, the insertion of two  
 771 transposases in pBFO17\_1 have excised most of the ParB-family DNA partitioning protein in the  
 772 corresponding sequence range in pBFS01\_1.

| Antimicrobial susceptibility <sup>a</sup> |               |                  |             | Antimicrobial resistance genes and IS elements <sup>b</sup> |                      |                       |        |                 |                                     |  |
|-------------------------------------------|---------------|------------------|-------------|-------------------------------------------------------------|----------------------|-----------------------|--------|-----------------|-------------------------------------|--|
| Strain                                    | Antimicrobial | Etest MIC (mg/L) | Result      | Gene                                                        | Upstream IS element  | Sequence <sup>c</sup> | %ID    | %COV            | Associated resistance to drug class |  |
| BFO17                                     | MEM           | >32              | R           | <i>cfiA11</i>                                               | IS614B               | Chr                   | 100.00 | 99.20           | Carbapenem                          |  |
|                                           | IPM           | >32              | R           |                                                             |                      |                       |        |                 |                                     |  |
|                                           | MTZ           | >32              | R           | <i>nimJ</i>                                                 | IS614B               | Chr                   | 99.40  | 100.00          | Nitroimidazole                      |  |
|                                           |               |                  |             | <i>nimJ</i>                                                 | IS614B               | Chr <sub>c</sub>      | 99.40  | 100.00          | Nitroimidazole                      |  |
|                                           | CLI           | 0.094            | S           |                                                             |                      |                       |        |                 |                                     |  |
|                                           | PTZ           | >256             | R           |                                                             |                      |                       |        |                 |                                     |  |
|                                           |               |                  |             | <i>tetQ</i>                                                 |                      | Chr                   | 99.34  | 99.34           | Tetracycline                        |  |
|                                           |               |                  |             | <i>cfxA4</i>                                                |                      | Chr                   | 85.71  | 100.00          | Cephamicin                          |  |
|                                           |               |                  |             | <i>bexB</i>                                                 |                      | Chr <sub>c</sub>      | 91.21  | 100.00          | Fluoroquinolone                     |  |
|                                           |               |                  |             | <i>bexA</i>                                                 |                      | Chr                   | 73.77  | 99.02           | Fluoroquinolone                     |  |
| BFO18                                     | MEM           | >32              | R           | <i>cfiA2_1</i>                                              | ISBf12               | Chr                   | 100.00 | 100.00          | Carbapenem                          |  |
|                                           | IPM           | 16               | R           |                                                             |                      |                       | 100.00 | 100.00          |                                     |  |
|                                           | MTZ           | 16               | R           | <i>nimD</i>                                                 | IS1169               | 2                     | 99.19  | 100.00          | Nitroimidazole                      |  |
|                                           | CLI           | 6                | R           | <i>ermF<sup>d</sup></i>                                     | IS4351               | Chr <sub>c</sub>      | 99.83  | 72.03           | Clindamycin                         |  |
|                                           |               |                  |             |                                                             | ISBthe1 <sup>d</sup> | Chr <sub>c</sub>      | 70.97  | 97.19           |                                     |  |
|                                           |               |                  |             | <i>erm(F)<sup>d</sup></i>                                   |                      | Chr <sub>c</sub>      | 99.58  | 29.71           |                                     |  |
|                                           |               |                  |             | <i>Inu(AN2)</i>                                             |                      | Chr <sub>c</sub>      | 100.00 | 100.00          | Clindamycin                         |  |
|                                           | PTZ           | >256             | R           |                                                             |                      |                       |        |                 |                                     |  |
|                                           |               |                  |             | <i>ugd</i>                                                  |                      | Chr                   | 65.69  | 53.04           | Polymyxin                           |  |
|                                           |               |                  |             | <i>bexA</i>                                                 |                      | Chr <sub>c</sub>      | 73.60  | 99.02           | Fluoroquinolone                     |  |
|                                           |               |                  |             | <i>bexB</i>                                                 |                      | Chr                   | 91.14  | 100.00          | Fluoroquinolone                     |  |
|                                           |               |                  |             | <i>tet(Q)</i>                                               |                      | Chr <sub>c</sub>      | 99.79  | 100.00          | Tetracycline                        |  |
|                                           |               |                  |             | <i>mef(En2)</i>                                             |                      | Chr <sub>c</sub>      | 99.83  | 100.00          | Macrolides                          |  |
|                                           |               |                  |             |                                                             |                      |                       |        |                 |                                     |  |
|                                           |               |                  |             |                                                             |                      |                       |        |                 |                                     |  |
| S01                                       | MEM           | >32              | R           | <i>cfiA13_1</i>                                             | IS1187               | Chr                   | 99.20  | 100.00          | Carbapenem                          |  |
|                                           | IPM           | 16               | R           |                                                             |                      |                       |        |                 |                                     |  |
|                                           | MTZ           | 64               | R           | <i>nimE</i>                                                 | ISBf6                | 3                     | 100.00 | 100.00          | Nitroimidazole                      |  |
|                                           | CLI           | >32              | R           | <i>erm(F)</i>                                               | IS1187               | Chr                   | 99.50  | 100.00          | Clindamycin                         |  |
|                                           | PTZ           | 6                | S           |                                                             |                      |                       |        |                 |                                     |  |
|                                           |               |                  |             | <i>tetQ</i>                                                 |                      | Chr                   | 90.02  | 99.95           | Tetracycline                        |  |
|                                           |               |                  |             | <i>tet(Q)</i>                                               |                      | Chr <sub>c</sub>      | 99.84  | 100.00          | Tetracycline                        |  |
|                                           |               |                  |             | <i>bexB</i>                                                 |                      | Chr <sub>c</sub>      | 91.06  | 100.00          | Fluoroquinolone                     |  |
|                                           |               |                  | <i>bexA</i> |                                                             | Chr                  | 74.03                 | 98.80  | Fluoroquinolone |                                     |  |
| BFO42                                     | MEM           | 0.094            | S           |                                                             |                      |                       |        |                 |                                     |  |
|                                           | IPM           | 0.25             | S           |                                                             |                      |                       |        |                 |                                     |  |
|                                           | MTZ           | 8                | R           | <i>nimA</i>                                                 | ISBf13               | 2                     | 98.64  | 96.61           | Nitroimidazole                      |  |
|                                           | CLI           | >256             | R           | <i>erm(F)</i>                                               | IS613                | Chr                   | 99.50  | 100.00          | Clindamycin                         |  |
|                                           |               |                  |             | <i>Inu(AN2)</i>                                             |                      | Chr                   | 100.00 | 100.00          | Clindamycin                         |  |
|                                           | PTZ           | 0.38             | S           |                                                             |                      |                       |        |                 |                                     |  |

|       |     |      |   |                 |                           |        |        |                              |             |
|-------|-----|------|---|-----------------|---------------------------|--------|--------|------------------------------|-------------|
|       |     |      |   | <i>ugd</i>      | Chr                       | 70.38  | 31.45  |                              |             |
|       |     |      |   | <i>cepA-49</i>  | Chr <sub>c</sub>          | 100.00 | 100.00 | Cephalosporin                |             |
|       |     |      |   | <i>mef(En2)</i> | Chr                       | 99.83  | 100.00 | Macrolide                    |             |
|       |     |      |   | <i>ugd</i>      | Chr                       | 71.15  | 31.11  | Polymyxin                    |             |
|       |     |      |   | <i>tetQ</i>     | Chr <sub>c</sub>          | 100.00 | 100.00 | Tetracycline                 |             |
|       |     |      |   | <i>bexB</i>     | Chr                       | 99.12  | 100.00 | Fluoroquinolone              |             |
|       |     |      |   | <i>ere(D)</i>   | Chr                       | 96.66  | 100.00 | Erythromycin                 |             |
|       |     |      |   | <i>aadS</i>     | Chr <sub>c</sub>          | 99.88  | 100.00 | Aminoglycoside               |             |
|       |     |      |   | <i>OXA-347</i>  | IS613<br>Chr <sub>c</sub> | 100.00 | 100.00 | Penicillin,<br>cephalosporin |             |
|       |     |      |   | <i>bexA</i>     | Chr                       | 75.09  | 99.62  | Fluoroquinolone              |             |
| BFO67 | MEM | 8    | R | <i>cfiA13_1</i> | None                      | Chr    | 100.00 | 100.00                       | Carbapenem  |
|       | IPM | 0.5  | S |                 |                           |        |        |                              |             |
|       | MTZ | 0.19 | S |                 |                           |        |        |                              |             |
|       | CLI | 0.38 | S |                 |                           |        |        |                              |             |
|       | PTZ | 2    | S |                 |                           |        |        |                              |             |
|       |     |      |   | <i>cfxA2</i>    | ISBf11                    | Chr    | 99.69  | 100.00                       | Cephameycin |
|       |     |      |   | <i>mef(En2)</i> | Chr                       | 99.75  | 100.00 | Macrolide                    |             |
|       |     |      |   | <i>Inu(AN2)</i> | Chr                       | 100.00 | 100.00 | Clindamycin                  |             |
|       |     |      |   | <i>ugd</i>      | Chr <sub>c</sub>          | 66.76  | 56.30  | Polymyxin                    |             |
|       |     |      |   | <i>tet(Q)</i>   | Chr                       | 100.00 | 100.00 | Tetracycline                 |             |
|       |     |      |   | <i>bexB</i>     | Chr <sub>c</sub>          | 90.92  | 100.00 | Fluoroquinolone              |             |
|       |     |      |   | <i>bexA</i>     | Chr                       | 73.90  | 99.02  | Fluoroquinolone              |             |
| BFO85 | MEM | 32   | R | <i>cfiA2_1</i>  | None                      | Chr    | 100.00 | 100.00                       | Carbapenem  |
|       | IPM | 1    | S |                 |                           |        |        |                              |             |
|       | MTZ | 0.25 | S |                 |                           |        |        |                              |             |
|       | CLI | >256 | R | <i>ermB</i>     | Chr <sub>c</sub>          | 99.19  | 98.66  | Clindamycin                  |             |
|       | PTZ | 2    | S |                 |                           |        |        |                              |             |
|       |     |      |   | <i>ugd</i>      | Chr                       | 69.84  | 31.45  | Polymyxin                    |             |
|       |     |      |   | <i>tetQ</i>     | Chr <sub>c</sub>          | 90.02  | 99.95  | Tetracycline                 |             |
|       |     |      |   | <i>aadE</i>     | Chr <sub>c</sub>          | 100.00 | 100.00 | Aminoglycoside               |             |
|       |     |      |   | <i>aad9</i>     | Chr <sub>c</sub>          | 100.00 | 100.00 | Aminoglycoside               |             |
|       |     |      |   | <i>bexB</i>     | Chr <sub>c</sub>          | 90.92  | 100.00 | Fluoroquinolone              |             |
|       |     |      |   | <i>bexA</i>     | Chr                       | 73.53  | 99.02  | Fluoroquinolone              |             |
|       |     |      |   | <i>cfxA2</i>    | IS614<br>Chr <sub>c</sub> | 100.00 | 100.00 | Cephameycin                  |             |
|       |     |      |   | <i>tet(Q)</i>   | Chr <sub>c</sub>          | 99.84  | 100.00 | Tetracycline                 |             |

773 Table 5. Antimicrobial susceptibility and resistance genes and IS elements for the six MDR *B. fragilis* strains.  
774 Identified genes are displayed next to the relevant antimicrobials. Identified IS elements in correct  
775 orientation (opposite strand) directly upstream of the genes are included. The %ID and %COV refer to the  
776 gene hit. Hits with %ID or %COV <98% were confirmed with BLASTx searches. The hits for *ugd* represent  
777 possible homologs for genes coding for PmrE, which is involved in polymyxin resistance in Gram-negative  
778 bacteria. Full ABRicate results with nucleotide positions and information on the IS elements is available the  
779 Supplementary Tables S4 AMR-IS-results.xlsx. Notes: <sup>a</sup> Results from previously published work following  
780 EUCAST breakpoints (14). <sup>c</sup> A<sub>c</sub> denotes complement strand. <sup>d</sup> A transposase has inserted itself, splitting the  
781 *ermF* gene in two. Abbreviations: %ID; percent identity, %COV; coverage percentage, Chr; chromosome.

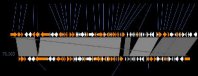

| Strain     | Best Spades graph | Hybrid assembly after first nanopore sequencing run. No Canu correction | Hybrid assembly after first nanopore sequencing run with Canu correction | Hybrid assembly with data from supplementary runs with Canu correction | After manual finishing | Final assemblies contig statistics |           |                     |
|------------|-------------------|-------------------------------------------------------------------------|--------------------------------------------------------------------------|------------------------------------------------------------------------|------------------------|------------------------------------|-----------|---------------------|
|            |                   |                                                                         |                                                                          |                                                                        |                        | No.                                | Length    | Relative read depth |
| CCUG 4856T |                   |                                                                         |                                                                          |                                                                        |                        | 1                                  | 5,205,133 | 1.00x               |
|            |                   |                                                                         |                                                                          |                                                                        |                        | 2                                  | 36,560    | 7.42x               |
| BFO17      |                   |                                                                         |                                                                          |                                                                        |                        | 1                                  | 5,474,541 | 1.00x               |
|            |                   |                                                                         |                                                                          |                                                                        |                        | 2                                  | 85,671    | 1.85x               |
|            |                   |                                                                         |                                                                          |                                                                        |                        | 3                                  | 5,594     | 23.03x              |
| BFO18      |                   |                                                                         |                                                                          |                                                                        |                        | 1                                  | 5,302,644 | 1.00x               |
|            |                   |                                                                         |                                                                          |                                                                        |                        | 2                                  | 7,221     | 25.98x              |
|            |                   |                                                                         |                                                                          |                                                                        |                        | 3                                  | 4,137     | 50.80x              |
|            |                   |                                                                         |                                                                          |                                                                        |                        | 4                                  | 2,782     | 59.91x              |
| S01        |                   |                                                                         |                                                                          |                                                                        |                        | 1                                  | 5,325,251 | 1.00x               |
|            |                   |                                                                         |                                                                          |                                                                        |                        | 2                                  | 78,085    | 2.29x               |
|            |                   |                                                                         |                                                                          |                                                                        |                        | 3                                  | 8,331     | 20.99x              |
|            |                   |                                                                         |                                                                          |                                                                        |                        | 4                                  | 5,595     | 22.67x              |
| BFO42      |                   |                                                                         |                                                                          |                                                                        |                        | 1                                  | 5,141,257 | 1.00x               |
|            |                   |                                                                         |                                                                          |                                                                        |                        | 2                                  | 8,306     | 40.06x              |
|            |                   |                                                                         |                                                                          |                                                                        |                        | 3                                  | 5,594     | 40.15x              |
| BFO67      |                   |                                                                         |                                                                          |                                                                        |                        | 1                                  | 5,478,614 | 1.00x               |
|            |                   |                                                                         |                                                                          |                                                                        |                        | 2                                  | 6,129     | 94.15x              |
| BFO85      |                   |                                                                         |                                                                          |                                                                        |                        | 1                                  | 5,504,076 | 1.00x               |



Blank graph paper with a grid and a diagonal line.

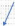

Source: http://biorxiv.org/content/10.1101/633602v2.full.pdf
